# Supplementary material for: Penaeid shrimp genome provides insights into benthic adaptation and frequent molting
Source: PubMed Central journal article supplement (PMC6341167; doi:10.1038/s41467-018-08197-4), 2019-01-21
Supplement: 41467_2018_8197_MOESM1_ESM.pdf [file 41467_2018_8197_MOESM1_ESM.pdf]

# Decoding the penaeid shrimp genome provides insights into benthic adaptation, frequent molting and breeding impacts

Zhang et al.

## Supplementary Information

### Supplementary Figures

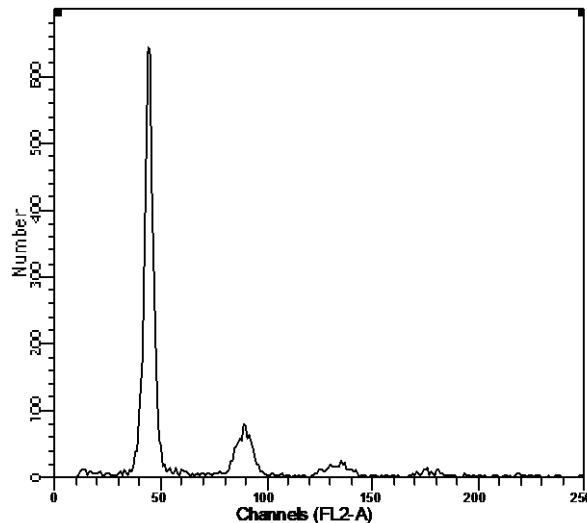

**Supplementary Figure 1. Flow cytometry results for measuring the genome size of *L. vannamei*.**

Based on previous reports<sup>1</sup>, the genome size of *L. vannamei* was estimated to be approximately  $71.5 \pm 5.2\%$  of the human genome (C value = 3.5pg). We validated the result by flow cytometry, with the *L. vannamei* genome size identified as 2.45 Gb.

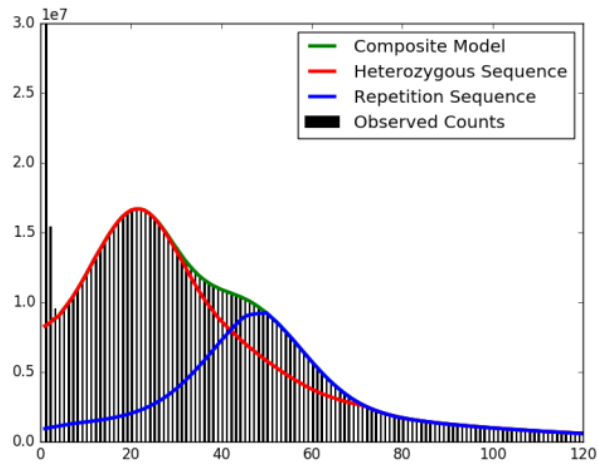

**Supplementary Figure 2. K-mer distribution of the *L.vannamei* genome sequences.**

"Composite Model" indicates the composite K-mer distribution of the genome of *L.vannamei*, "Heterozygous Sequence" indicates the K-mer distribution of simulated heterozygous sequences, "Repetition Sequence" indicates the K-mer distribution of simulated repetitive sequences. K-mer analysis estimated the genome size of *L.vannamei* to be 2.6 Gb.

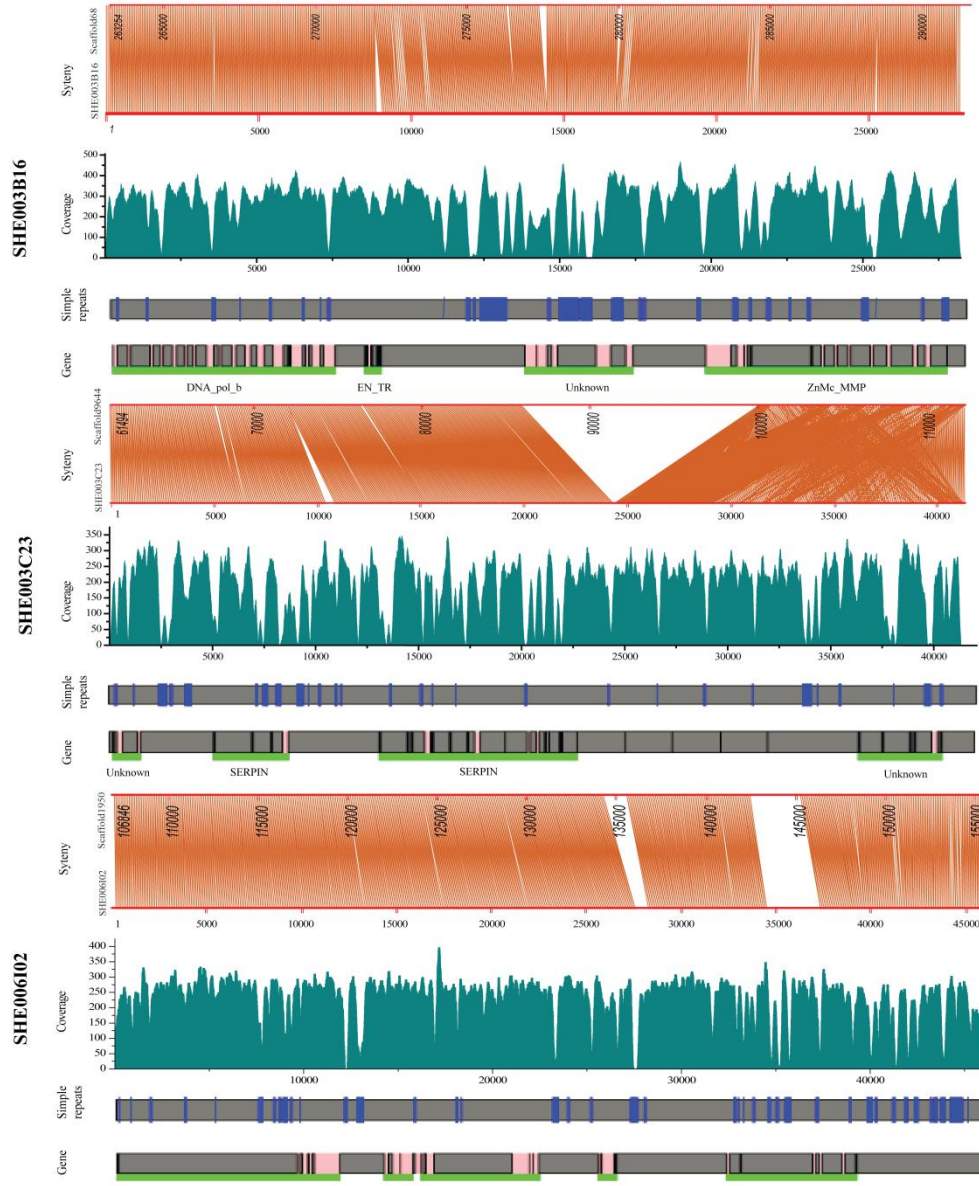

**Supplementary Figure 3. The assembly accuracy of the *L. vannamei* genome assessed by three full BAC sequences.**

"Synteny" indicates the synteny between the assembly scaffolds and BAC clones sequenced by the Sanger method, "Coverage" indicates the Illumina coverage along each assembly scaffold, "Simple repeats" indicates the distribution of SSRs along each assembly scaffold, "Gene" indicates the distribution of gene features along each assembly scaffold, pink block indicates exons, and green block indicates genes. Low sequencing coverage of the Illumina data were detected at the SSR regions, making the assembly highly fragmental. BAC clones were completely covered by corresponding single scaffold with high synteny, suggesting the high accuracy of the assembly.

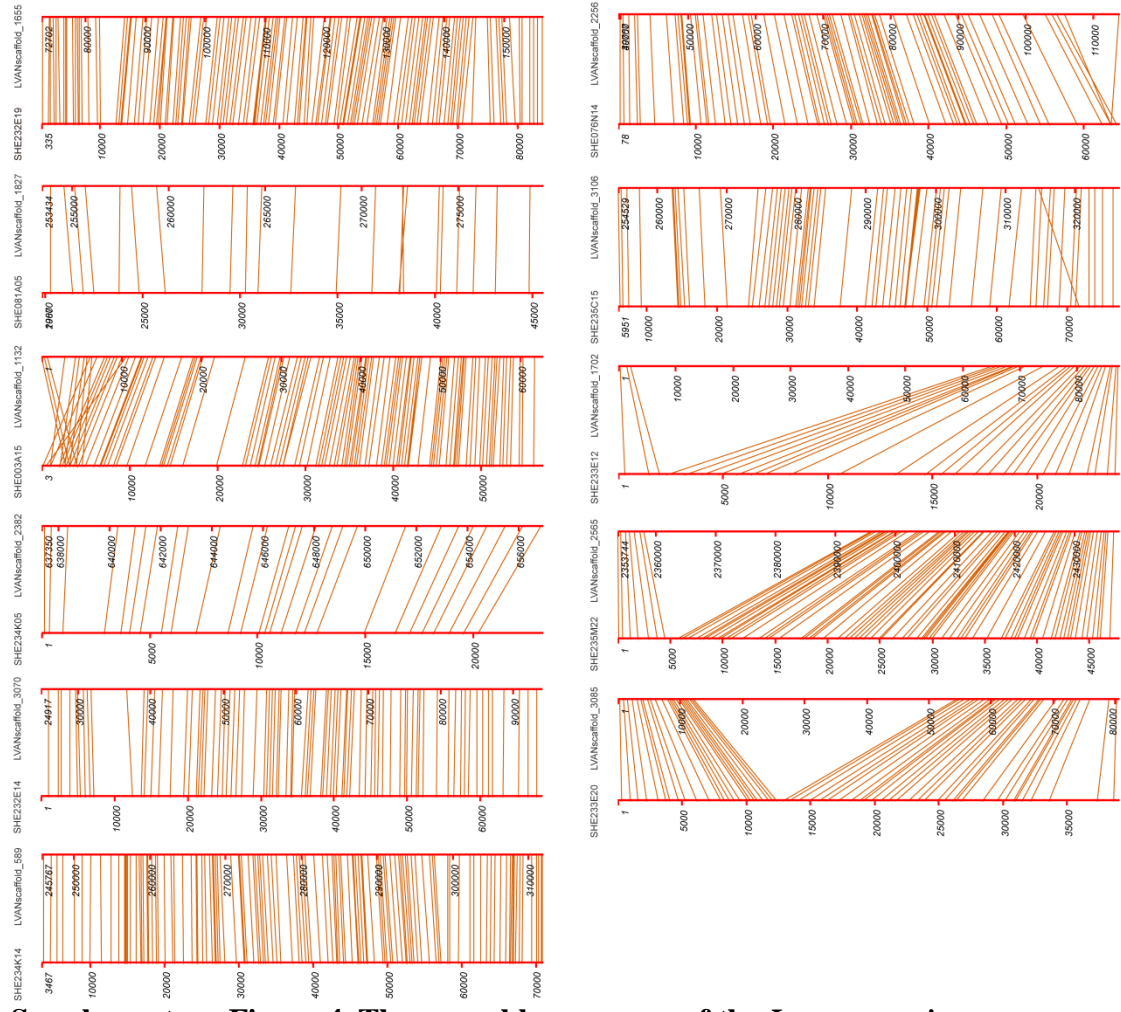

**Supplementary Figure 4. The assembly accuracy of the *L. vannamei* genome assessed by 11 PacBio sequenced BAC sequences.**

BAC clones were completely covered by corresponding single scaffold with high synteny, suggesting the high accuracy of the assembly.

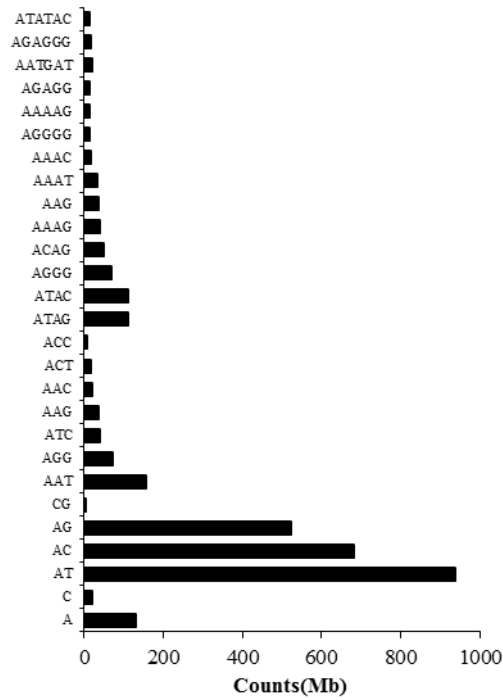

**Supplementary Figure 5. Distribution of different types of SSRs in the *L. vannamei* genome.**

Dinucleotide repeats are the most prevalent type of SSRs in *L. vannamei* genome, the (AT)<sub>n</sub>, (AC)<sub>n</sub>, and (AG)<sub>n</sub> account for 81.40% of total SSRs.

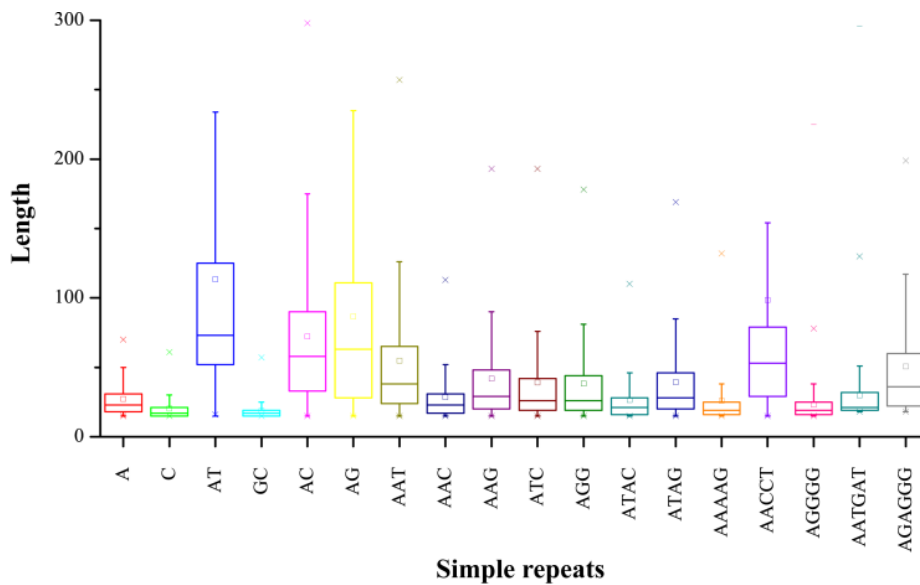

**Supplementary Figure 6. Box plot of the length of SSRs.**

The average length of dinucleotide repeats, including (AT)<sub>n</sub>, (AC)<sub>n</sub>, and (AG)<sub>n</sub>, are longer than other SSRs, followed by a pentanucleotide repeat (AACCT)<sub>n</sub>, with an average length of 97 bp, even though it only accounts for 0.07% of the genome.

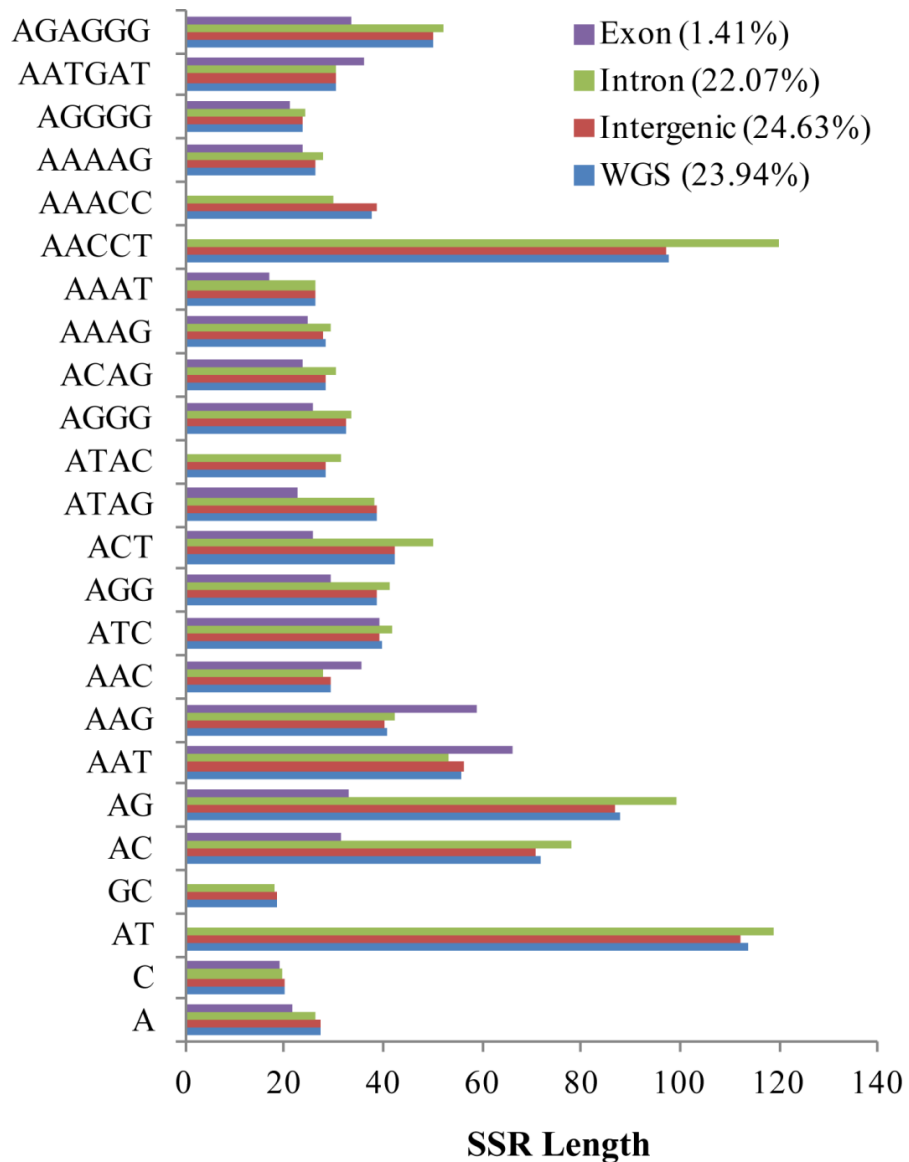

**Supplementary Figure 7. The distribution of SSRs in the genome of *L. vannamei*.** The distribution of SSRs was similar in the exon, intron, and intergenic regions. The length of  $(AACCT)_n$  in the introns are relatively longer than those in other genomic regions.

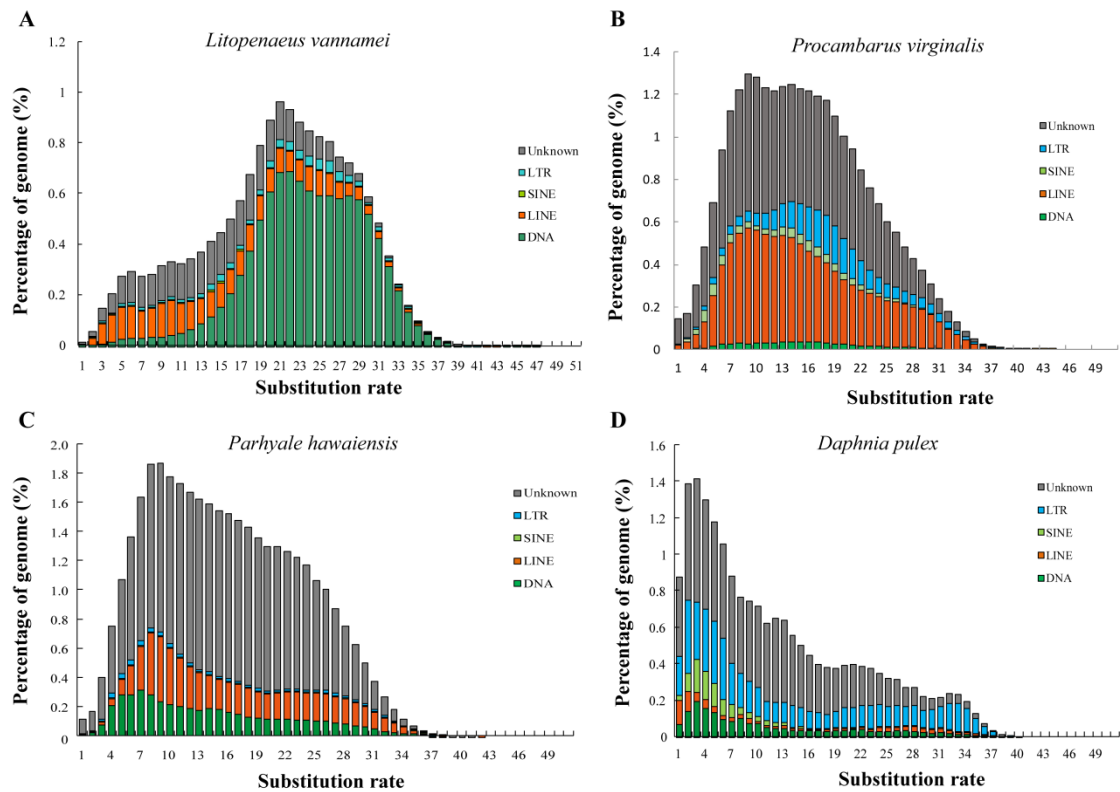

**Supplementary Figure 8. Age distribution of repeats in the crustacean genomes.**

The substitution rates were calculated between the genomic and repeat consensus sequences. The two transposable element expansion peaks were found in four genomes, (A) *L. vannamei*, (B) *P. virginalis*, (C) *P. hawaiensis*, and (D) *D. pulex*. In comparison to the other three crustaceans, *L. vannamei* has a major expansion of transposable elements at older age (substitution rate of 19-33).

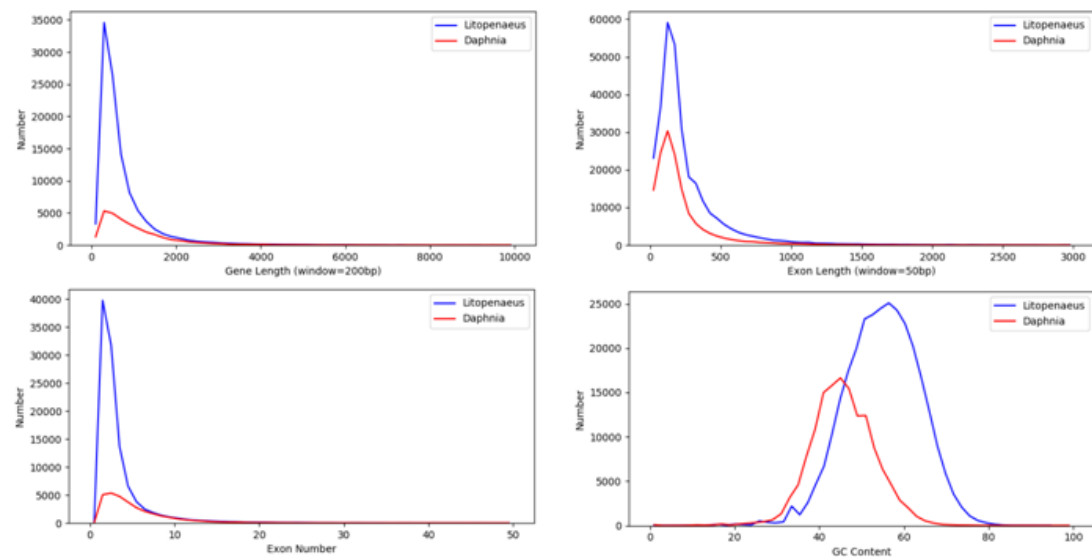

**Supplementary Figure 9. Gene structure comparison between *L. vannamei* and *D. pulex*.**

Four gene features, including gene length, exon length, exon number, and GC content of genes, were compared between *L. vannamei* and *D. pulex*. *L. vannamei* showed

similar distribution of gene length, exon length, and exon number with *D. pulex*, but have higher GC content than *D. pulex*.

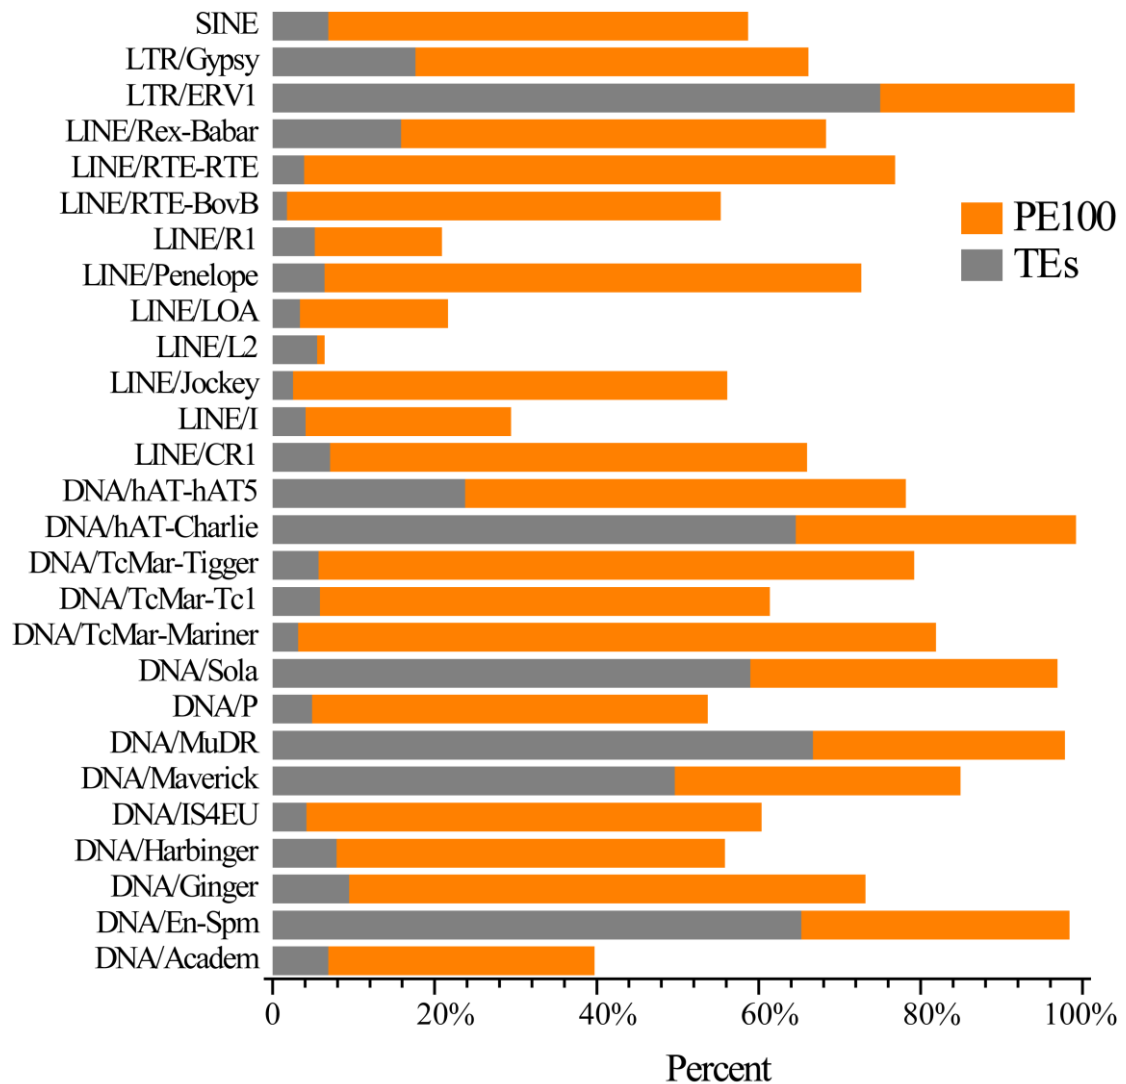

**Supplementary Figure 10. The distribution of SSRs on TEs.**

Most of TEs and their up- or down-stream sequences contain SSRs. "PE100" indicates the up- or down-stream sequences contain SSRs, and "TEs" indicates TEs itself contain SSRs.



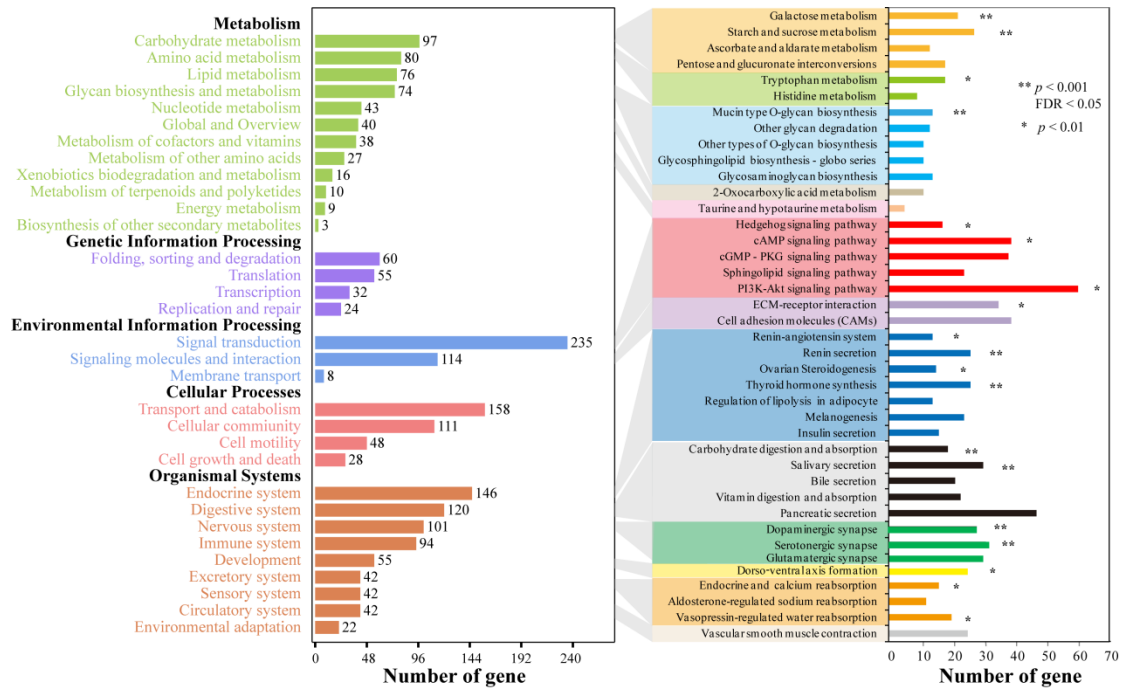

**Supplementary Figure 11 KEGG enrichment of the species-specific genes of *L. vannamei*.**

The species-specific genes of *L. vannamei* were particularly enriched in the KEGG terms of carbohydrate metabolism, signal transduction, endocrine system, digestive system, nervous system, and immune system.

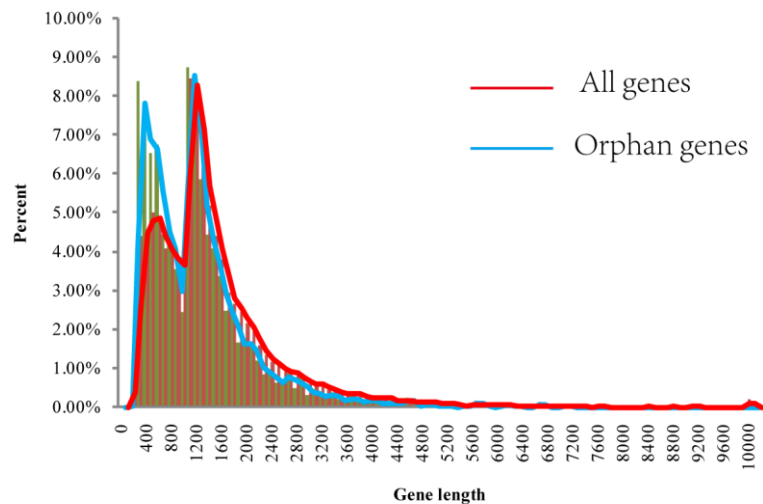

**Supplementary Figure 12. Distribution of orphan genes length in the *L. vannamei* genome.**

A group of orphan genes (1,282) with the gene length significantly shorter than the average length of all genes.

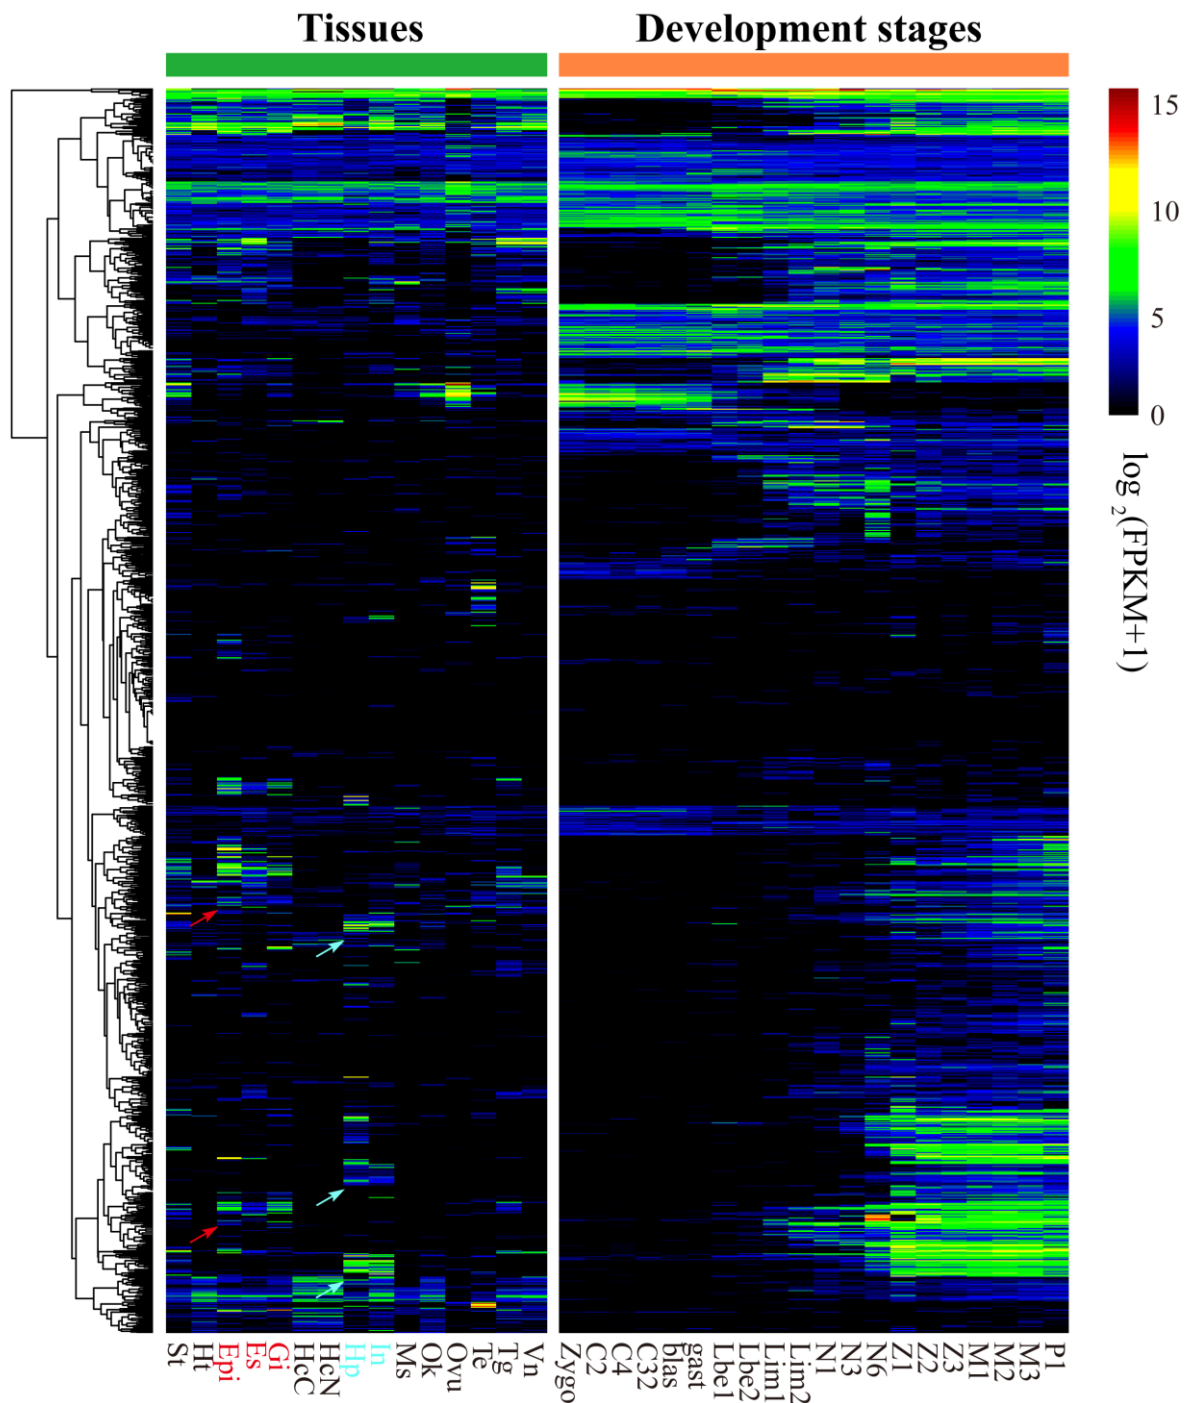

**Supplementary Figure 13. The expression patterns of orphan genes in different tissues and developmental stages.**

These orphan genes displayed special temporal and spatial expression patterns that most of them were up-regulated at the stage of limb bud embryo, and some of them specifically expressed in intestinal, hepatopancreas, eyestalk, cuticle and gill, implying that these orphan genes play an important role during larval development. Tissues: Hc hemocyte, Ms muscle, In intestine, Ov ovary, St stomach, Oka lymphoid organ, Gi gill, Hp hepatopancreas, Te testis, Es eyestalk, Epi epidermis, Tg thoracic ganglion, Vn ventral ganglion, Ht heart.

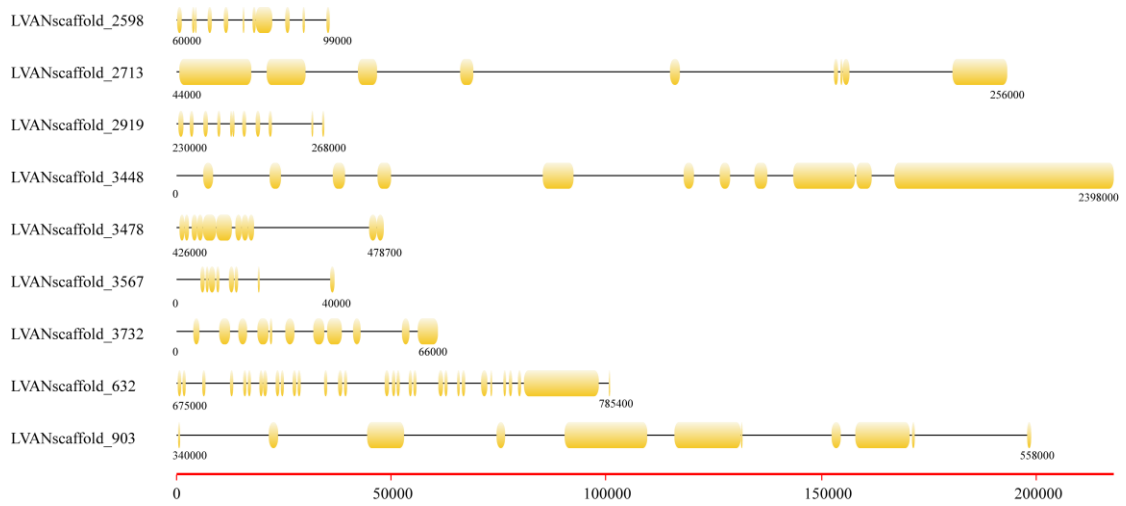

**Supplementary Figure 14. The tandemly duplicated genes in the *L. vannamei* genome.**

Every yellow box represents a gene, and the genes on the same scaffold are tandemly duplicated.





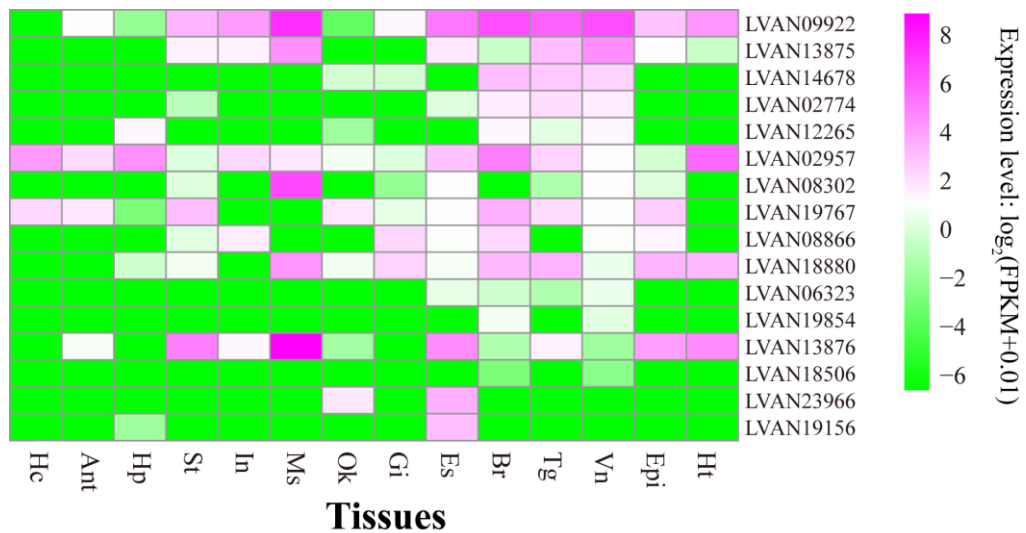

**Supplementary Figure 17. The expressions of glycine receptor genes in different tissues.**

GlyRs were mainly expressed in nervous system as well as in muscle and intestinal tissues. Hc, hemocyte. Ms, muscle. In, intestine. St, stomach. Oka, lymphoid organ. Gi, gill. Hp, hepatopancreas. Es, eyestalk. Epi, epidermis. Tg, thoracic ganglion. Vn, ventral ganglion. Ht, heart.



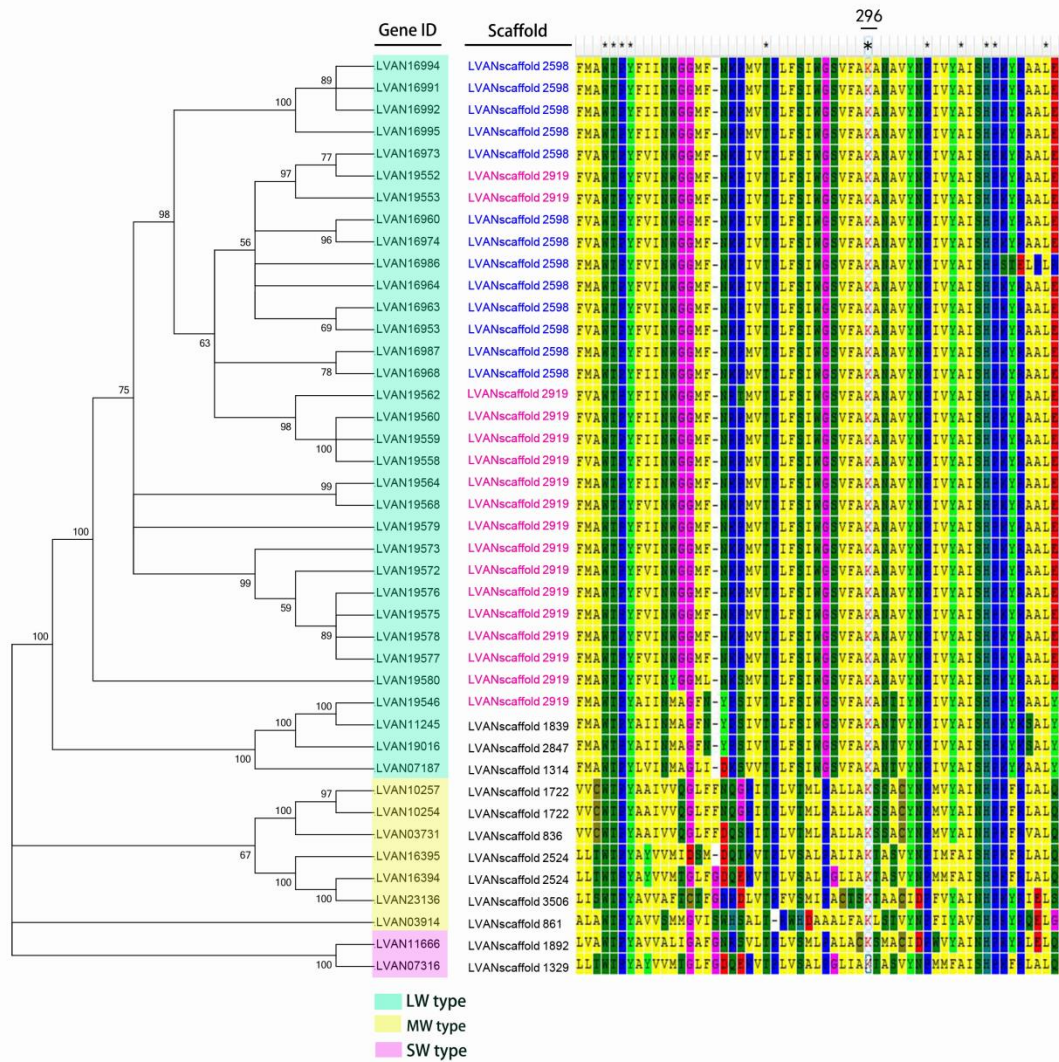

**Supplementary Figure 18. Phylogenetic analysis and partial alignment of *L. vannamei* opsins.**

Opsin peptides of *L. vannamei* cluster into three subfamilies in a neighbor-joining analysis with 1,000 bootstrap replicates. Branch support values are indicated next to crucial nodes. Gene ID is color-coded to indicate their subfamily corresponding to the long-wavelength type (LW), middle-wavelength type (MW) and short-wavelength type (SW). The scaffold of opsin genes is indicated in the middle panel, while the amino acid alignment is shown in the right panel. Conserved sites are indicated by asterisks on the top, while the key lysine residue (K296) necessary for the Schiff base formation is highlighted.

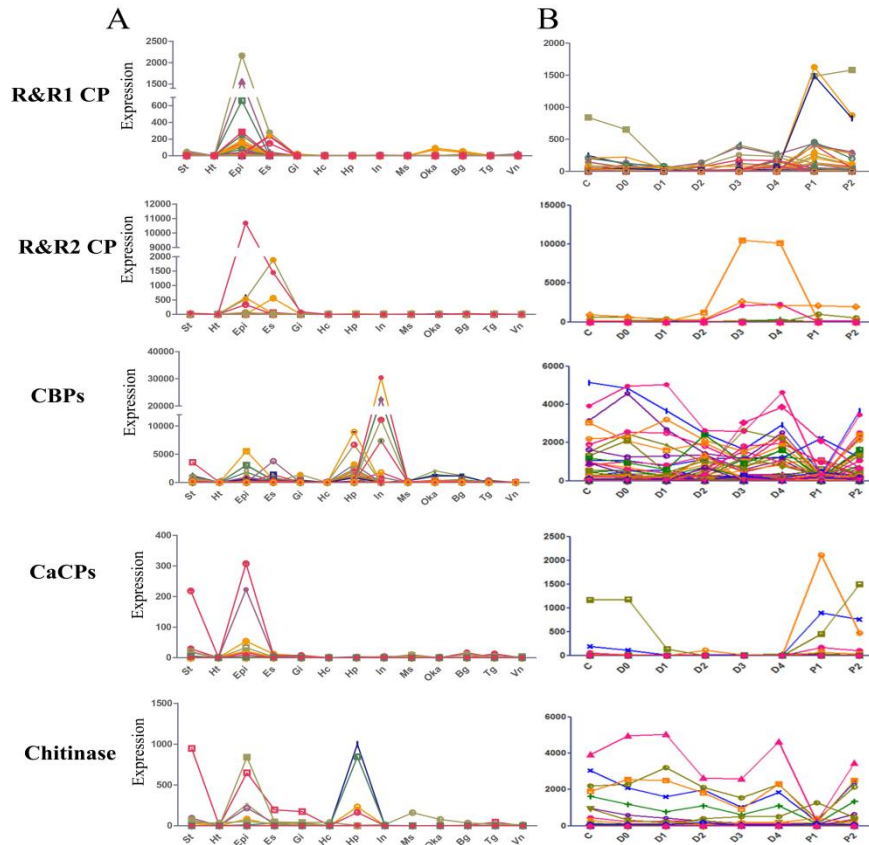

**Supplementary Figure 19. The expression patterns of structural protein genes in different tissues (A) and molting stages (B).**

Structural protein: cuticle proteins (including R&R1 type CP and R&R2 type CP), chitin binding proteins (CBPs), calcification related cuticular proteins (CaCPs). Tissues: St, stomach. Ht, heart. Epi, epidermis. Es, eyestalk. Gi, gill. Hc, hemocyte. Hp, hepatopancreas. In, intestine. Ms, muscle. Oka, lymphoid organ. Bg, brain ganglion. Tg, thoracic ganglion. Vn, ventral ganglion.

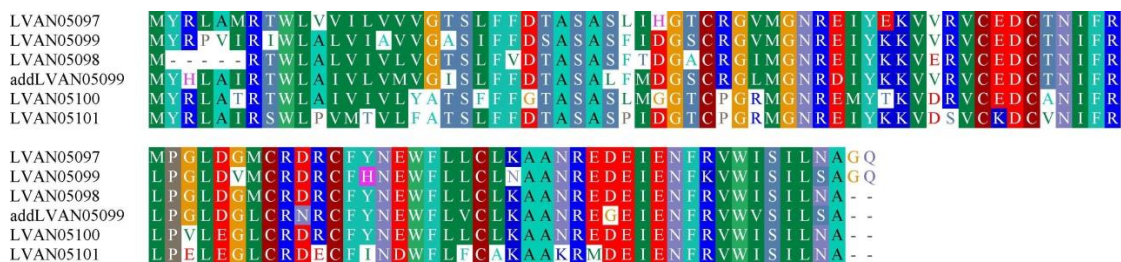

**Supplementary Figure 20. Sequence alignment of MIH peptides in Scaffold1036.**

Alignment of the full length (including signal peptide) amino acid sequence of six MIH genes in Scaffold1036 indicates six cysteine sites that are highly conserved in the CHH gene family.



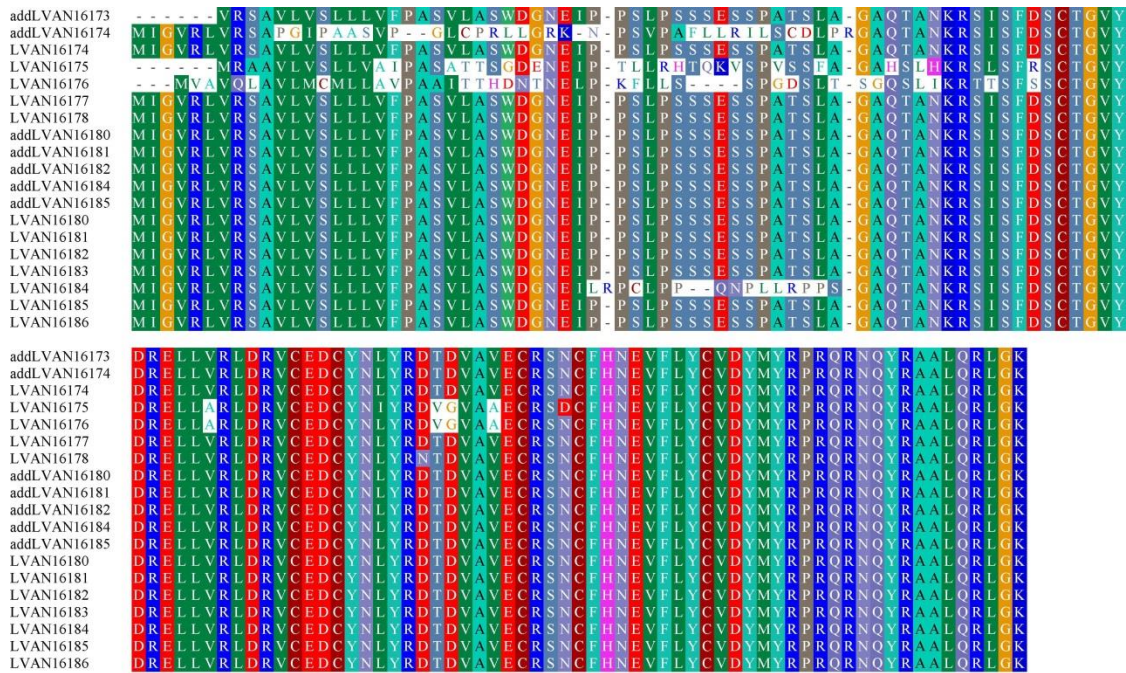

**Supplementary Figure 21. Sequence alignment of type I CHH peptides in Scaffold2490.**

Alignment of the full length (including signal peptide) amino acid sequence of CHH genes in Scaffold2490 indicates six cysteine sites that are highly conserved in the CHH gene family, and amidation at the C terminal which is associated with hyperglycemic activities.

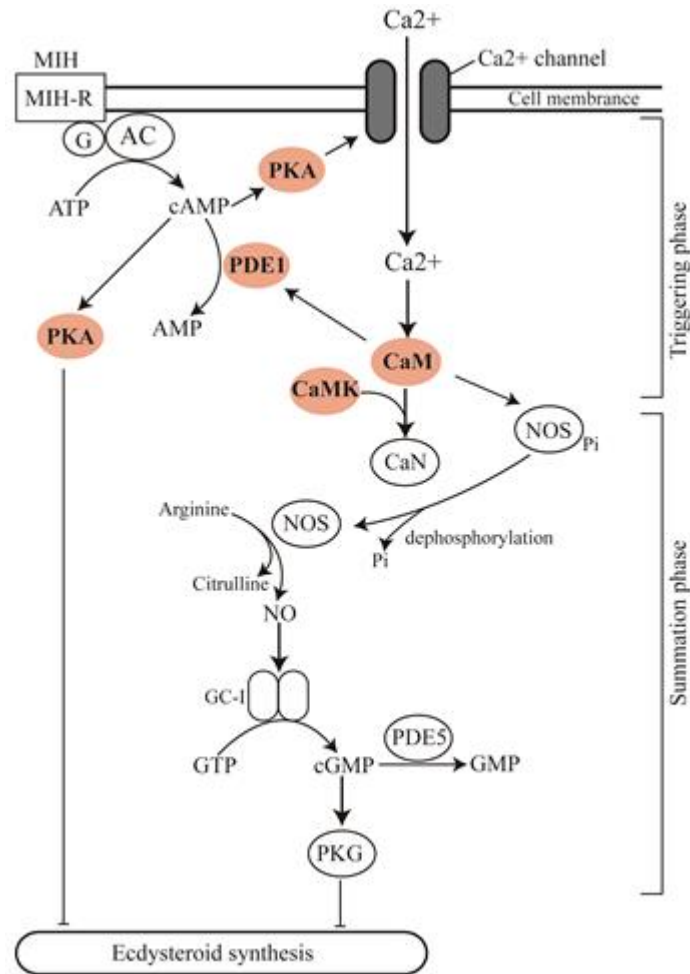

**Supplementary Figure 22. Positively selected genes related to MIH signaling pathway in *L. vannamei*.**

The circles with red backgrounds represent the positively selected genes in *L. vannamei*. Modified from Chang and Mykles<sup>2</sup>, and Covi<sup>3</sup>.

|                   |                              |                                 |
|-------------------|------------------------------|---------------------------------|
| <b>SREs</b>       | <b>TCACNCCAC<sup>1</sup></b> | <b>ACTACANNTCCC<sup>2</sup></b> |
| <b>MIHS1036-3</b> | <b>TC<b>AAGCCAC</b></b>      | <b>ACC<b>CACCCCT</b></b>        |
| <b>MIHS1036-4</b> | <b>GC<b>ATGCCAC</b></b>      | <b>ACT<b>TAAATACC</b></b>       |
| <b>MIHS1036-6</b> | <b>TC<b>GCAGCAC</b></b>      | <b>ACT<b>ACA-TTCCC</b></b>      |
| <b>MIHC1028</b>   | <b>TC<b>CAGCAC</b></b>       | <b>ACC<b>CACCACAC</b></b>       |

**Supplementary Figure 23. The putative sterol regulatory elements (SREs) located in the regulatory sequence of different MIH genes.**

The conserved nucleotides of putative and reported SREs<sup>4,5</sup> are in red.

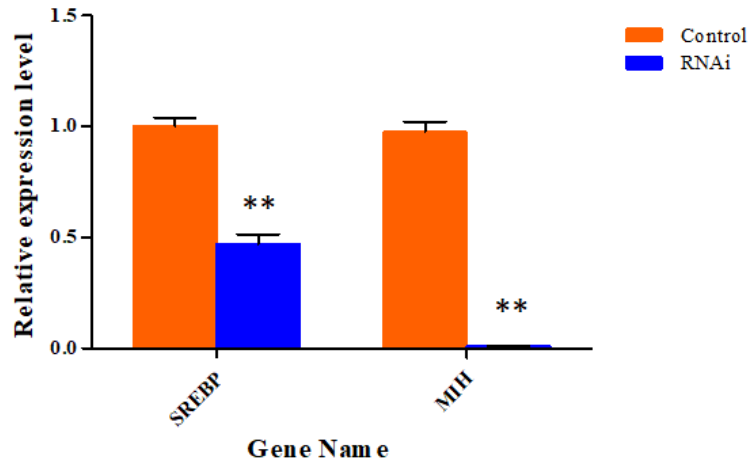

**Supplementary Figure 24. DsRNA-mediated silencing efficiency of SREBP and MIH.**

The expression of SREBP and MIH in eyestalk of *L. vannamei* was detected by qPCR with the primer pairs SREBP-qF/SREBP-qR and MIH1036-6qF/MIH1036-6qR listed in supplementary Table 31. Control: eyestalk samples from shrimp injected with dsEGFP. RNAi: eyestalk samples from shrimp injected with dsSREBP and dsMIH, respectively. Significant difference at  $P < 0.01$  of the expression level in two treatments was shown with two stars (\*\*). Three replicates were performed in each treatment. Error bars stand the Standard Error of the Mean (SEM).

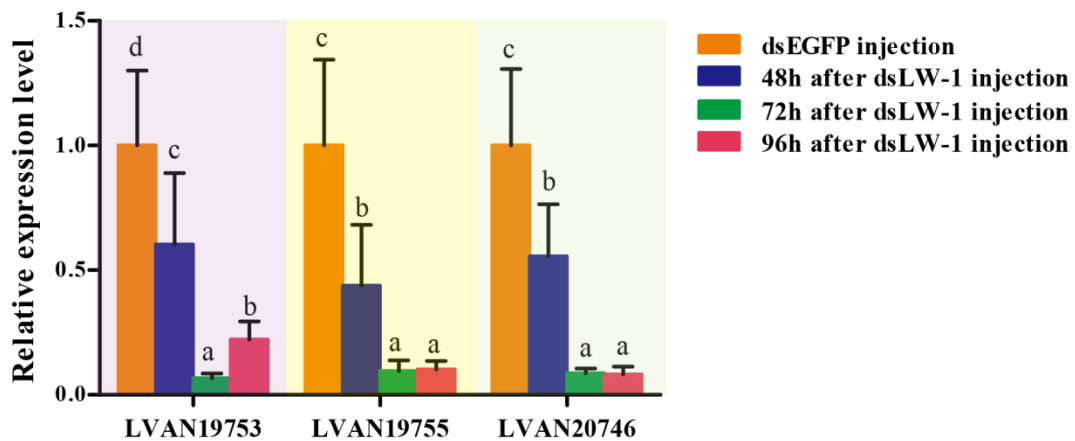

**Supplementary Figure 25. dsRNA-mediated silencing of opsin genes over time after LW-1 opsin gene RNAi treatments.**

Relative expressions of three opsin genes were detected at 48, 72 and 96 hours after knockdown of the LW-1 opsin gene (Supplementary Table 33). The expressions of three opsins after injection of dsEGFP were used as negative control treatments. Different lower-case letters indicate significant differences ( $P < 0.01$ ) among different treatments. Three replicates were performed in each treatment. Error bars stand the Standard Error of the Mean (SEM).

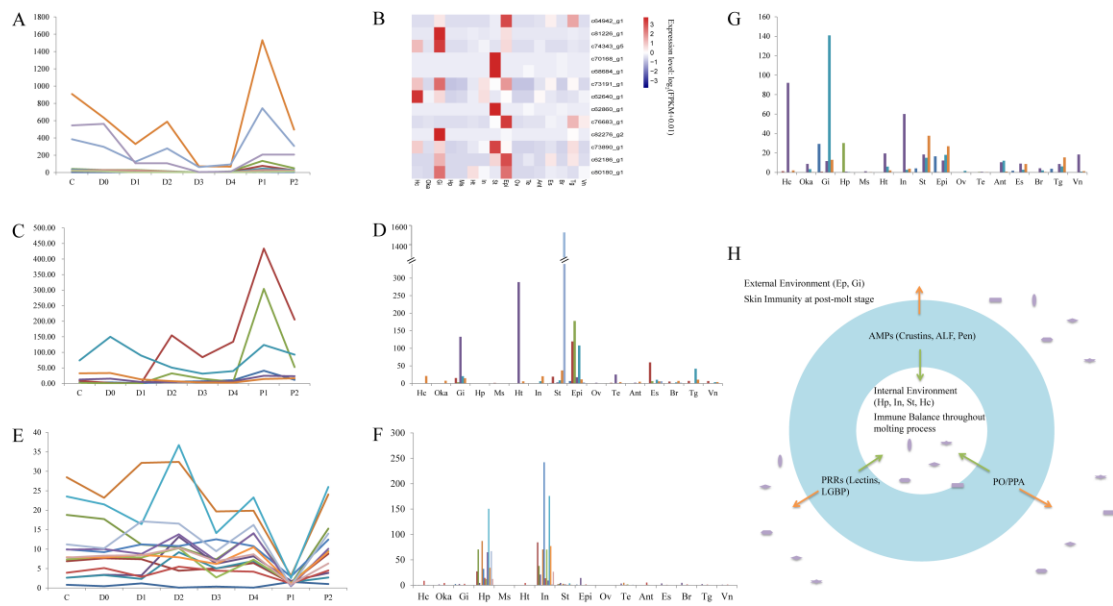

### Supplementary Figure 26. Immune-related genes in the molting stages.

**A.** Expression patterns of crustin genes during molting stages. **B.** Tissue distribution of crustin genes which were differentially expressed during molting process. **C.** Expression patterns of selected lectin genes highly expressed at the post-molt stage. **D.** Tissue distribution of selected lectin genes highly expressed at the post-molt stage. **E.** Expression patterns of apoptosis related genes during molting stages. **F.** Tissue distribution of apoptosis related genes differentially expressed during molting process. **G.** Tissue distribution of phenoloxidase system genes differentially expressed during molting process. **H.** Immune protection of shrimp during molting process. C, intermolt. D0~D2, early pre-molt. D3 and D4, late pre-molt. P1 and P2, post-molt. Hc, hemocytes. Oka, lymphoid organ. Gi, gill. Hp, hepatopancreas. Ms, muscle. Ht, heart. In, intestine. St, stomach. Epi, epidermis. Ov, ovary. Te, testis. Ant, antennal gland. Es, eyestalk. Br, brain. Tg, thoracic ganglion. Vn, ventral ganglion.

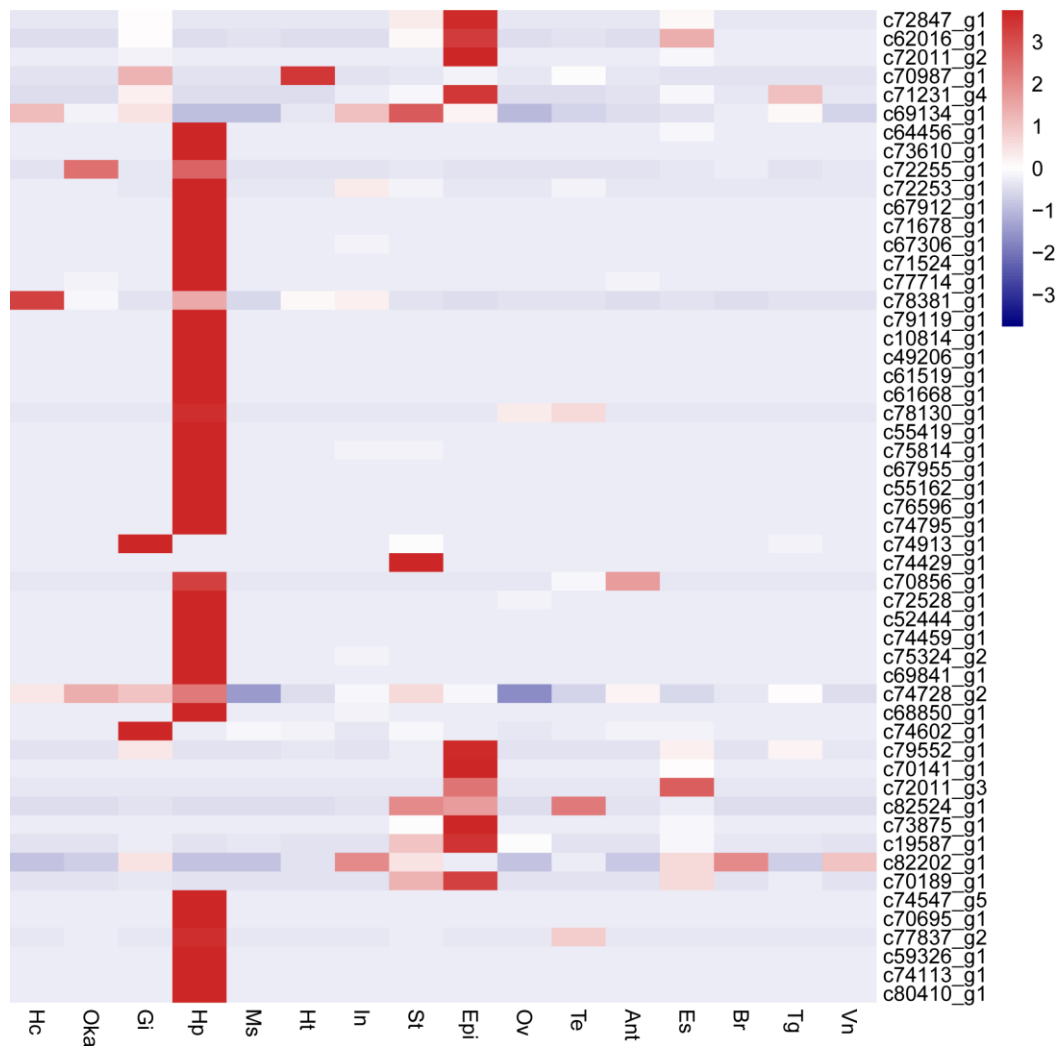

**Supplementary Figure 27. Tissue distribution of lectin genes differentially expressed during the molting process.**

Hc, hemocytes. Oka, lymphoid organ. Gi, gill. Hp, hepatopancreas. Ms, muscle. Ht, heart. In, intestine. St, stomach. Epi, epidermis. Ov, ovary. Te, testis. Ant, antennal gland. Es, eyestalk. Br, brain. Tg, thoracic ganglion. Vn, ventral ganglion.

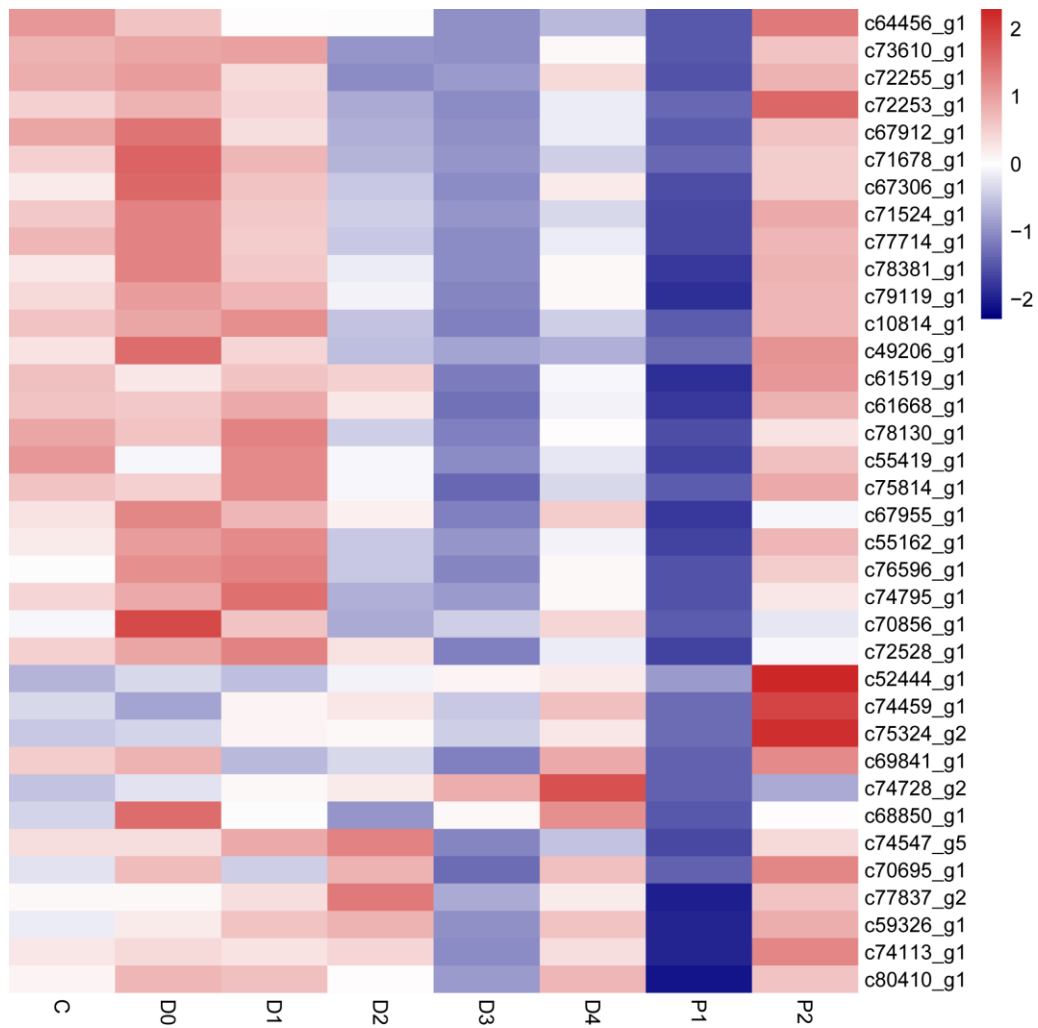

**Supplementary Figure 28. Expression patterns of highly expressed lectin genes in hepatopancreas during the molting stages.**

C, inter-molt. D0~D2, early pre-molt. D3 and D4, late pre-molt. P1 and P2, post-molt.

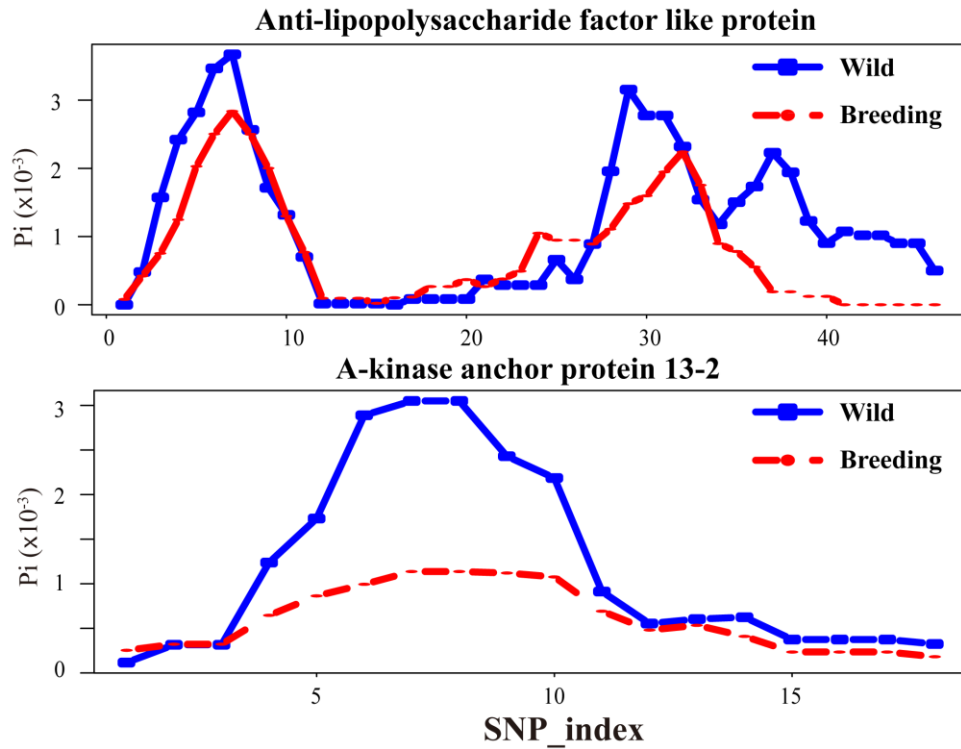

**Supplementary Figure 29. The genetic diversity value  $\theta\pi$  in wild and breeding population for the genes encoding anti-lipoplysaccharide factor like protein (ALF) and A-kinase anchor protein 13-2 (AKAP13-2).**

A sliding-window approach (2 kb windows with 400 bp increments) was used to calculate  $\theta\pi$  of every window for each gene, the SNP-index indicate the sliding-window of each gene.

## Supplementary Tables

**Supplementary Table 1. Statistics of Illumina sequencing data**

| Insert size (bp) | Reads Length (bp) | Total Raw Bases (Gb) | Total Clean bases (Gb) | Depth (×)*    |
|------------------|-------------------|----------------------|------------------------|---------------|
| 180              | 100_100           | 254.89               | 213.09                 | 86.98         |
| 300              | 100-100           | 159.32               | 148.48                 | 60.60         |
| 500              | 100_100           | 251.05               | 227.12                 | 92.70         |
| 800              | 100_100           | 57.15                | 47.91                  | 19.56         |
| 1000             | 80_80             | 13.54                | 12.32                  | 5.03          |
| 2000             | 100_100           | 83.52                | 75.42                  | 30.78         |
| 5000             | 100_100           | 68.75                | 51.44                  | 21.00         |
| 10000            | 100_100           | 43.30                | 37.40                  | 15.27         |
| 20000            | 100_100           | 23.12                | 15.15                  | 6.18          |
| <b>Total</b>     |                   |                      | <b>828.33</b>          | <b>338.09</b> |

\* Genome size ~2.45 Gb

**Supplementary Table 2. Statistics of PacBio sequencing data**

| Step         | Mean length | Data                   | Coverage (×)* |
|--------------|-------------|------------------------|---------------|
| Lvhn02       | 5,625       | 2,862,452,927          | 1.17          |
| Lv1_1        | 6,551       | 25,490,552,307         | 10.40         |
| Lv1_2        | 12,748      | 26,814,636,230         | 10.94         |
| Lv1_3        | 12,432      | 25,286,562,106         | 10.32         |
| Lv1_4        | 10,478      | 52,409,584,996         | 21.39         |
| <b>Total</b> |             | <b>132,863,788,566</b> | <b>54.23</b>  |

\* Genome size ~2.45 Gb

**Supplementary Table 3. Statistics of BAC end sequencing data**

|                                         |                 |
|-----------------------------------------|-----------------|
| Number of BAC clones sequenced          | 18828           |
| Number of ends sequenced(pre-processed) | 34,266 (28,993) |
| Paired-end sequences                    | 11,972*2        |
| Total length of sequences (bp)          | 11278277        |
| Percentage of sequenced genome          | 0.0046          |
| GC content                              | 0.3948          |
| Average length of sequences (bp)        | 389             |



**Supplementary Table 4. Comparison of six assembly methods\***

|          | SOAPdenovo   | DBG2OLC       | Falcon        | SmartDenovo   | HABOT         | WTDBG         |               |
|----------|--------------|---------------|---------------|---------------|---------------|---------------|---------------|
| Contig   | Number       | 811,715       | 43,938        | 463,151       | 60,355        | 110,906       | 50,304        |
|          | Total length | 1,348,135,370 | 1,299,024,195 | 1,588,197,701 | 1,775,688,090 | 1,686,653,167 | 1,618,026,442 |
|          | Longest      | 1,219,275     | 707,549       | 1,219,275     | 421,901       | 214,418       | 739,419       |
|          | Shortest     | 100           | 1,349         | 300           | 1,062         | 100           | 63            |
|          | N50          | 2,826         | 43,564        | 9,496         | 34,826        | 25,477        | 57,650        |
|          | N90          | 712           | 13,276        | 1,271         | 15,383        | 9,552         | 14,641        |
|          | >2kb         | 195,846       | 43,927        | 165,107       | 60,301        | 90,055        | 47,569        |
| Scaffold | Number       | 145,352       |               | 314,564       |               | 36,276        | 4,683         |
|          | Total length | 1,895,785,128 |               | 1,804,586,902 |               | 1,902,472,206 | 1,663,559,157 |
|          | Longest      | 2,851,279     |               | 1,219,275     |               | 9,249,119     | 3,458,369     |
|          | Shortest     | 315           |               | 300           |               | 70            | 1,028         |
|          | N50          | 124,644       |               | 23,547        |               | 398,269       | 605,555       |
|          | N90          | 10,570        |               | 2,315         |               | 18,231        | 204,841       |
|          | >2kb         | 46,374        |               | 114,313       |               | 30,967        | 4,618         |

\* The assembly results of SOAPdenovo were based on the Illumina sequencing data only. The assemblies of the other five different assembly methods, including DBG2OLC, Falcon, SmartDenovo, HABOT, WTDBG, were based on the PacBio data. As the contigs assembled by DBG2OLC and SmartDenovo showed poor accuracy and completeness, it was not used for the scaffolding.

**Supplementary Table 5. Genome assembly comparison among five crustaceans.**

| Species               | Genome size (Gb) | Scaffold N50 (Kb) | Longest scaffold (Mb) | Contig N50 (Kb) | Longest contig (Kb) |
|-----------------------|------------------|-------------------|-----------------------|-----------------|---------------------|
| <i>L. vannamei</i>    | 2.6              | 605.555           | 3.458369              | 57.65           | 739.419             |
| <i>D. pulex</i>       | 0.2              | 642.089           | 4.19303               | 47.461          | 528.83              |
| <i>P. hawaiiensis</i> | 3                | 69.178            | 1.285385              | 4.003           | 141.947             |
| <i>P. virginalis</i>  | 3.5              | 39.275            | 0.717999              | 0.745           | 69.465              |
| <i>E. sinensis</i>    | 1.66             | 111.755           | 2.002076              | 2.666           | 100.563             |

The assembly of *L. vannamei* and *D. pulex* both showed high quality that the contig N50 and scaffold N50 as well as the longest contig and scaffold were all much longer than the other three crustaceans. However, *L. vannamei* has significantly larger genome size and more SSR contents than *D. pulex*, indicating it has a higher complex genome structure than *D. pulex*, *E. sinensis*<sup>6</sup>.

**Supplementary Table 6. Illumina reads coverage on assembly genome**

|        |                            |             |
|--------|----------------------------|-------------|
| Reads  | Number of clean reads      | 391,866,685 |
|        | Percentage of mapped reads | 93.25%      |
| Genome | Coverage (%)               | 87%         |
|        | Coverage at least 5× (%)   | 76%         |
|        | Coverage at least 10× (%)  | 70%         |
|        | Coverage at least 20× (%)  | 62%         |
|        | Coverage at least 50× (%)  | 45%         |

**Supplementary Table 7. Transcriptome unigene coverage on assembly genome.**

| Analysis                   | Unigenes |
|----------------------------|----------|
| Unigene_number             | 71,703   |
| Match_gene_number          | 67,725   |
| Match_gene_percentage      | 94.45%   |
| 90%_in_one_scaf_number     | 44,853   |
| 90%_in_one_scaf_percentage | 62.55%   |
| 50%_in_one_scaf_number     | 62,315   |
| 50%_in_one_scaf_percentage | 86.91%   |

**Supplementary Table 8. Completeness of the 248 core eukaryotic genes.**

|          | #Prots | %Completeness | #Total | Average | %Ortho |
|----------|--------|---------------|--------|---------|--------|
| Complete | 191    | 77.02         | 241    | 1.26    | 21.99  |
| Group 1  | 50     | 75.76         | 61     | 1.22    | 22.00  |
| Group 2  | 43     | 76.79         | 48     | 1.12    | 11.63  |
| Group 3  | 44     | 72.13         | 59     | 1.34    | 27.27  |
| Group 4  | 54     | 83.08         | 73     | 1.35    | 25.93  |
| Partial  | 235    | 94.76         | 350    | 1.49    | 36.60  |
| Group 1  | 62     | 93.94         | 87     | 1.40    | 33.87  |
| Group 2  | 53     | 94.64         | 71     | 1.34    | 28.30  |
| Group 3  | 56     | 91.80         | 93     | 1.66    | 44.64  |
| Group 4  | 64     | 98.46         | 99     | 1.55    | 39.06  |

**Supplementary Table 9. Linkage map coverage on assembly genome.**

|                                                      |               |
|------------------------------------------------------|---------------|
| Total markers                                        | 9,332         |
| Quantity of scaffolds anchored on linkage groups     | 3,275         |
| Total length of scaffolds anchored on linkage groups | 1,449,959,403 |
| Percentage of scaffolds anchored on linkage groups   | 87.34%        |

**Supplementary Table 10. Summary of repetitive sequences.**

|                             |                                                 |             |             |       |
|-----------------------------|-------------------------------------------------|-------------|-------------|-------|
| Sequences:                  | 4,683                                           |             |             |       |
| Total length:               | 1,663,565,344 bp (1,618,053,217 bp excluding N) |             |             |       |
| Bases masked:               | 821,412,354 bp (49.38 %)                        |             |             |       |
|                             | Number                                          | Length      | Percent     |       |
| SINEs:                      | 2,934                                           | 1,021,571   | 0.06%       |       |
| LINEs:                      | 126,578                                         | 46,932,128  | 2.82%       |       |
|                             | RTE-BovB                                        | 22,215      | 12,816,134  | 0.77% |
|                             | Penelope                                        | 26,094      | 7,406,171   | 0.45% |
| LTR elements:               | 36,163                                          | 10,259,678  | 0.62%       |       |
|                             | ERV_classI                                      | 4,291       | 353,176     | 0.02% |
|                             | Gypsy                                           | 8,747       | 3,659,760   | 0.22% |
| DNA elements:               | 932,683                                         | 155,145,405 | 9.33%       |       |
|                             | hAT-Charlie                                     | 140,434     | 15,746,723  | 0.95% |
|                             | En-Spm                                          | 975,260     | 106,281,063 | 6.39% |
|                             | Maverick                                        | 52,513      | 13,342,433  | 0.80% |
| Unclassified:               | 216,901                                         | 55,650,866  | 3.35%       |       |
| Total interspersed repeats: |                                                 | 269,009,648 | 16.17%      |       |
| Satellites:                 | 13,527                                          | 1,550,312   | 0.09%       |       |
| Simple repeats:             | 5,515,074                                       | 398,243,493 | 23.93%      |       |
| Low complexity:             | 1,103,699                                       | 154,532,775 | 9.29%       |       |

**Supplementary Table 11. Simple sequence repeats in different species<sup>7-17</sup>.**

|                       | Species                | Common name           | Percent (%) |
|-----------------------|------------------------|-----------------------|-------------|
| Plants                | <i>B. distachyon</i>   | Purple false brome    | 1.89        |
|                       | <i>S. bicolor</i>      | Sorghum               | 2.49        |
|                       | <i>O. sativa</i>       | Asian rice            | 2.9         |
|                       | <i>Z. mays</i>         | Maíz                  | 0.86        |
|                       | <i>A. thaliana</i>     | Thale cress           | 0.45        |
|                       | <i>T. urartu</i>       | Einkorn wheat         | 1.21        |
| Vertebrate            | <i>F. peregrinus</i>   | Peregrine             | 0.01        |
|                       | <i>F. cherrug</i>      | Saker                 | 0           |
|                       | <i>T. guttata</i>      | Zebrafinch            | 0           |
|                       | <i>G. gallus</i>       | Chicken               | 0           |
|                       | <i>D. rerio</i>        | Zebrafish             | 0           |
|                       | <i>L. crocea</i>       | Large yellow croaker  | 1.72        |
|                       | <i>T. rubripes</i>     | Tiger puffer          | 1.74        |
|                       | <i>H. sapiens</i>      | Human                 | 0.84        |
| Insect                | <i>L. migratoria</i>   | Locust                | 0.2         |
|                       | <i>D. melanogaster</i> | Fruit fly             | 1.08        |
|                       | <i>A. gambiae</i>      | Mosquitoes            | 1.08        |
|                       | <i>P. humanus</i>      | Human lice            | 10.52       |
|                       | <i>A. mellifera</i>    | Cape honey bee        | 1.92        |
| Other<br>Invertebrate | <i>C. elegans</i>      | Roundworm             | 0.35        |
|                       | <i>H. robusta</i>      | Leech                 | 6.36        |
|                       | <i>C. teleta</i>       | Polychaete            | 1.09        |
|                       | <i>C. gigas</i>        | Pacific oyster        | 0.72        |
|                       | <i>L. gigantea</i>     | Owl limpet            | 0.55        |
|                       | <i>L. vannamei</i>     | Pacific white shrimp  | 23.93       |
|                       | <i>D. pulex</i>        | Water flea            | 0.78        |
| Fungi                 | <i>N. crassa</i>       | Red bread mold        | 0.82        |
|                       | <i>S. cerevisiae</i>   | Yeast                 | 0.36        |
|                       | <i>T. pseudonana</i>   | Marine centric diatom | 0.23        |

**Supplementary Table 12. Comparison of repetitive sequences among four crustaceans<sup>14,18,19</sup>.**

|                             | <i>L. vannamei</i> | <i>P. virginalis</i> | <i>P. hawaiiensis</i> | <i>D. pulex</i> |
|-----------------------------|--------------------|----------------------|-----------------------|-----------------|
| Total length:               | 1.66 Gb            | 3.29 Gb              | 4.02 Gb               | 197 Mb          |
| Bases masked:               | 821 Mb             | 875 Mb               | 1.49 Gb               | 40 Mb           |
| Repeat percent:             | 49.38%             | 26.59%               | 37.17%                | 20.45%          |
| SINEs:                      | 0.06%              | 0.80%                | 0.03%                 | 0.98%           |
| LINEs:                      | 2.82%              | 9.52%                | 6.43%                 | 0.90%           |
| RTE-BovB                    | 0.77%              | 0.12%                | 0.19%                 | 0.24%           |
| Penelope                    | 0.45%              | 0.74%                | 1.02%                 | 0.02%           |
| L3/CR1                      | 0.25%              | 5.80%                | 3.31%                 | 0.00%           |
| LTR elements:               | 0.62%              | 2.50%                | 0.58%                 | 5.48%           |
| ERV_classI                  | 0.02%              | 0.00%                | 0.02%                 | 0.00%           |
| Gypsy                       | 0.22%              | 0.79%                | 0.00%                 | 2.77%           |
| DIRS                        | 0.00%              | 1.49%                | 0.03%                 | 0.28%           |
| DNA elements:               | 9.33%              | 0.62%                | 4.49%                 | 1.75%           |
| En-Spm                      | 6.39%              | 0.01                 | 0.05%                 | 0.25%           |
| TcMar-Tc1                   | 0.03%              | 0.00%                | 1.93%                 | 0.05%           |
| Maverick                    | 0.80%              | 0.07%                | 0.15%                 | 0.00%           |
| Charlie                     | 0.95%              | 0.03                 | 0.13%                 | 0.00%           |
| Tigger                      | 0.04%              | 0.33%                | 0.05%                 | 0.02%           |
| Unclassified:               | 3.35%              | 11.88%               | 24.31%                | 10.22%          |
| Total interspersed repeats: | 16.17%             | 25.32%               | 35.84%                | 19.33%          |
| Satellites:                 | 0.09%              | 0.04%                | 0.04%                 | 0.00%           |
| Simple repeats:             | 23.93%             | 0.99%                | 1.27%                 | 0.44%           |
| Low complexity              | 9.29%              | 0.32%                | 0.13%                 | 0.67%           |

**Supplementary Table 13. Comparison of gene structures among three crustaceans<sup>14,18,19</sup>**

| Gene structure        | <i>L. vannamei</i> | <i>P. hawaiiensis</i> | <i>D. pulex</i> |
|-----------------------|--------------------|-----------------------|-----------------|
| Gene number           | 25,572             | 30,603                | 35,837          |
| Gene average length   | 8,888.69           | 17,955.15             | 1,828.70        |
| Gene Max length       | 329,769            | 623,480               | 114,502         |
| Gene Min length       | 165                | 18                    | 58              |
| Gene length < 500bp   | 336                | 5,621                 | 10,092          |
| CDS average length    | 1,546.31           | 2,041.23              | 1,074.25        |
| CDS Max length        | 35,259             | 28,449                | 25,464          |
| CDS Min length        | 160                | 150                   | 58              |
| Exon number per gene  | 5.94               | 3.64                  | 3.97            |
| Exon average length   | 259.95             | 220.08                | 211.65          |
| Intron average length | 1,483.77           | 6,067.77              | 301.27          |

**Supplementary Table 14. Noncoding small RNAs in the *L. vannamei* genome**

| Category       | Name(copy number)                                                                                                                                                                                                                                                                                                                                                                                                                                                                                                                                                                                                                                                                                                                                                                                                                                                                                                                                                                                                                                                                                                                                                                                                                                                                                                                                                                                                                                                                                                                                                                                                            |
|----------------|------------------------------------------------------------------------------------------------------------------------------------------------------------------------------------------------------------------------------------------------------------------------------------------------------------------------------------------------------------------------------------------------------------------------------------------------------------------------------------------------------------------------------------------------------------------------------------------------------------------------------------------------------------------------------------------------------------------------------------------------------------------------------------------------------------------------------------------------------------------------------------------------------------------------------------------------------------------------------------------------------------------------------------------------------------------------------------------------------------------------------------------------------------------------------------------------------------------------------------------------------------------------------------------------------------------------------------------------------------------------------------------------------------------------------------------------------------------------------------------------------------------------------------------------------------------------------------------------------------------------------|
| antisense      | RNAI(1)                                                                                                                                                                                                                                                                                                                                                                                                                                                                                                                                                                                                                                                                                                                                                                                                                                                                                                                                                                                                                                                                                                                                                                                                                                                                                                                                                                                                                                                                                                                                                                                                                      |
| Cis-regulatory | Histone3(51), Hsp83_3_UTR(3), K_chan_RES(4), RRE(1)                                                                                                                                                                                                                                                                                                                                                                                                                                                                                                                                                                                                                                                                                                                                                                                                                                                                                                                                                                                                                                                                                                                                                                                                                                                                                                                                                                                                                                                                                                                                                                          |
| Intron         | Intron_gpII(1)                                                                                                                                                                                                                                                                                                                                                                                                                                                                                                                                                                                                                                                                                                                                                                                                                                                                                                                                                                                                                                                                                                                                                                                                                                                                                                                                                                                                                                                                                                                                                                                                               |
| lncRNA         | Sphinx_1(2), Sphinx_2(1)                                                                                                                                                                                                                                                                                                                                                                                                                                                                                                                                                                                                                                                                                                                                                                                                                                                                                                                                                                                                                                                                                                                                                                                                                                                                                                                                                                                                                                                                                                                                                                                                     |
| ribozyme       | RNase_MRP(2), RNaseP_arch(2), RNaseP_nuc(86)                                                                                                                                                                                                                                                                                                                                                                                                                                                                                                                                                                                                                                                                                                                                                                                                                                                                                                                                                                                                                                                                                                                                                                                                                                                                                                                                                                                                                                                                                                                                                                                 |
| rRNA           | 5_8S_rRNA(38), LSU_rRNA_archaea(44), LSU_rRNA_bacteria(48), LSU_rRNA_eukarya(75), PK-G12rRNA(25), SSU_rRNA_archaea(54), SSU_rRNA_bacteria(30), SSU_rRNA_eukarya(85), SSU_rRNA_microsporidia(65)                                                                                                                                                                                                                                                                                                                                                                                                                                                                                                                                                                                                                                                                                                                                                                                                                                                                                                                                                                                                                                                                                                                                                                                                                                                                                                                                                                                                                              |
| snoRNA         | ACEA_U3(54), Fungi_U3(34), Plant_U3(51), SCARNA7(1), SCARNA8(2), snoMe28S-Cm2645(1), SNORA23(1), SNORA3(1), SNORA53(6), SNORA58(1), SNORA73(5), SNORA74(2), SNORA79(2), SNORA9(2), SNORD15(3), SNORD18(1), SNORD27(3), SNORD31(10), SNORD38(1), snosnr61(1), sR5(1), U3(56), SNORA23(1), SNORA3(1), SNORA53(6), SNORA58(1), SNORA73(5), SNORA74(2)                                                                                                                                                                                                                                                                                                                                                                                                                                                                                                                                                                                                                                                                                                                                                                                                                                                                                                                                                                                                                                                                                                                                                                                                                                                                           |
| snRNA          | ACEA_U3(54), Fungi_U3(34), Plant_U3(51), sR5(1), U12(1), U3(56), U4(9), U5(44), U6(35), U6atac(11)                                                                                                                                                                                                                                                                                                                                                                                                                                                                                                                                                                                                                                                                                                                                                                                                                                                                                                                                                                                                                                                                                                                                                                                                                                                                                                                                                                                                                                                                                                                           |
| tRNA           | tRNA(1394), tRNA-Sec(64)                                                                                                                                                                                                                                                                                                                                                                                                                                                                                                                                                                                                                                                                                                                                                                                                                                                                                                                                                                                                                                                                                                                                                                                                                                                                                                                                                                                                                                                                                                                                                                                                     |
| miRNA          | miR-1(1), miR-2(4), miR-7(2), miR-9(5), miR-10(1), miR-12(1), miR-29(1), miR-33(2), miR-34(2), miR-71(1), miR-79(3), miR-92(1), miR-100(1), miR-124(1), miR-133(1), miR-153(1), miR-184(2), miR-190(1), miR-193(1), miR-210(1), miR-235(1), miR-252(2), miR-263(2), miR-275(1), miR-276(1), miR-277(1), miR-278(1), miR-279(1), miR-281(1), miR-282(1), miR-285(1), miR-306(2), miR-317(1), miR-745(2), miR-750(1), miR-981(1), miR-993(1), miR-995(1), miR-1000(1), miR-1175(1), miR-2001(1), miR-2765(1), miR-2788(1), miR-3791(1), miR-7478(1), bantam(1), miR-iab-41(1), let-7(1), n1(1), n2(1), n3(2), n4(2), n5(1), n6(1), n7(1), n8(2), n9(2), n10(1), n11(1), n12(2), n13(1), n14(1), n15(1), n16(1), n17(2), n18(1), n19(1), n20(1), n21(2), n22(1), n23(1), n24(1), n25(1), n26(2), n27(1), n28(1), n29(2), n30(1), n31(1), n32(1), n33(1), n34(1), n35(1), n36(1), n37(1), n38(1), n39(1), n40(1), n41(1), n42(1), n43(1), n44(2), n45(1), n46(1), n47(1), n48(1), n49(2), n50(1), n51(2), n52(1), n53(1), n54(1), n55(1), n56(1), n57(1), n58(1), n59(1), n60(1), n61(2), n62(2), n63(1), n64(1), n65(2), n66(2), n67(1), n68(1), n69(2), n70(1), n71(1), n72(1), n73(1), n74(1), n75(1), n76(3), n77(1), n78(1), n79(1), n80(1), n81(1), n82(1), n83(1), n84(1), n85(1), n86(1), n87(2), n88(1), n89(1), n90(1), n91(1), n92(1), n93(1), n94(2), n95(1), n96(1), n97(1), n98(2), n99(1), n100(1), n101(1), n102(1), n103(1), n104(1), n105(2), n106(1), n107(1), n108(1), n109(1), n110(1), n111(1), n112(1), n113(1), n114(1), n115(1), n116(1), n117(3), n118(2), n119(1), n120(1), n121(2), n122(1), n123(1) |

**Supplementary Table 15. GO enrichment analysis of the *L. vannamei* specific gene families.**

| GO ID      | Description                                                     | GeneRatio<br>(602) | BgRatio (3944) | P-value  | FDR      |
|------------|-----------------------------------------------------------------|--------------------|----------------|----------|----------|
| GO:0016020 | membrane                                                        | 391 (64.95%)       | 2239 (56.77%)  | 6.00E-06 | 1.55E-03 |
| GO:0007156 | homophilic cell adhesion via plasma membrane adhesion molecules | 18 (1.92%)         | 55 (0.73%)     | 6.80E-05 | 4.48E-02 |
| GO:0098609 | cell-cell adhesion                                              | 18 (1.92%)         | 57 (0.76%)     | 1.14E-04 | 4.48E-02 |
| GO:0098742 | cell-cell adhesion via plasma-membrane adhesion molecules       | 18 (1.92%)         | 57 (0.76%)     | 1.14E-04 | 4.48E-02 |

**Supplementary Table 16. KEGG enrichment analysis of the *L. vannamei* specific gene families.**

| Pathway ID | Pathway                               | DEGs<br>(1163) | All genes<br>(6581) | P-value  | Q-value  |
|------------|---------------------------------------|----------------|---------------------|----------|----------|
| ko00052    | Galactose metabolism                  | 22 (1.89%)     | 54 (0.82%)          | 5.60E-05 | 8.96E-03 |
| ko04973    | Carbohydrate digestion and absorption | 19 (1.63%)     | 44 (0.67%)          | 6.90E-05 | 8.96E-03 |
| ko00512    | Mucin type O-glycan biosynthesis      | 14 (1.2%)      | 28 (0.43%)          | 9.10E-05 | 8.96E-03 |
| ko04970    | Salivary secretion                    | 30 (2.58%)     | 89 (1.35%)          | 1.82E-04 | 1.24E-02 |
| ko04924    | Renin secretion                       | 26 (2.24%)     | 74 (1.12%)          | 2.29E-04 | 1.24E-02 |
| ko05030    | Cocaine addiction                     | 16 (1.38%)     | 37 (0.56%)          | 2.53E-04 | 1.24E-02 |
| ko00500    | Starch and sucrose metabolism         | 27 (2.32%)     | 81 (1.23%)          | 4.63E-04 | 1.95E-02 |
| ko04726    | Serotonergic synapse                  | 31 (2.67%)     | 101 (1.53%)         | 9.08E-04 | 3.35E-02 |
| ko04728    | Dopaminergic synapse                  | 28 (2.41%)     | 89 (1.35%)          | 1.04E-03 | 3.39E-02 |
| ko04918    | Thyroid hormone synthesis             | 26 (2.24%)     | 83 (1.26%)          | 1.65E-03 | 4.88E-02 |

**Supplementary Table 17. Number of neuronal development regulatory genes in *L. vannamei* and other arthropods.**

|                                           | Lva | Api | Aga | Ame | Bmo | Dpu | Dme | Isc | Lmi | Pha | Phu | Sma | Tur | Tca | Zne |
|-------------------------------------------|-----|-----|-----|-----|-----|-----|-----|-----|-----|-----|-----|-----|-----|-----|-----|
| G-protein-coupled receptors (GPCRs)       | 457 | 100 | 63  | 136 | 71  | 50  | 163 | 56  | 51  | 60  | 59  | 60  | 65  | 114 | 52  |
| transient receptor potential(TRP) channel | 53  | 5   | 2   | 8   | 3   | 2   | 6   | 0   | 5   | 29  | 3   | 0   | 0   | 7   | 8   |
| Ionotropic Glutamate Receptors (iGluRs)   | 166 | 26  | 14  | 44  | 16  | 25  | 33  | 9   | 16  | 39  | 14  | 28  | 14  | 51  | 15  |
| glycine receptors (GlyRs)                 | 154 | 6   | 4   | 31  | 3   | 3   | 21  | 7   | 4   | 12  | 2   | 29  | 6   | 27  | 3   |
| Innexin                                   | 21  | 14  | 7   | 7   | 9   | 7   | 26  | 6   | 7   | 12  | 5   | 9   | 26  | 16  | 4   |
| protocadherins                            | 47  | 5   | 3   | 12  | 6   | 3   | 11  | 2   | 6   | 3   | 3   | 1   | 3   | 8   | 1   |
| C2H2 zinc-finger proteins (C2H2 ZNFs)     | 414 | 18  | 13  | 35  | 25  | 14  | 33  | 23  | 16  | 22  | 13  | 19  | 37  | 28  | 15  |
| crustacyanin                              | 101 | 0   | 0   | 0   | 0   | 0   | 0   | 0   | 0   | 1   | 0   | 0   | 0   | 0   | 0   |

Lva, *Litopenaeus vannamei*. Api, *Acyrtosiphon pisum*. Aga, *Anopheles gambiae*. Ami, *Apis mellifera*. Bmo, *Bombyx mori*. Dpu, *Daphnia pulex*. Dme, *Drosophila melanogaster*. Isc, *Ixodes scapularis*. Lmi, *Locust migratoria*. Pha, *Parhyale hawaiensis*. Phu, *Pediculus humanus*. Sma, *Strigamia maritima*. Tur, *Tetranychus urticae*. Tca, *Tribolium castaneum*. Zne, *Zootermopsis nevadensis*.



**Supplementary Table 18. Number of ionotropic glutamate receptors (iGluR) genes in Metazoans.**

| Species                              | Total | NMDA | AMPA | Kainate | Delta | Undetermined subtype |
|--------------------------------------|-------|------|------|---------|-------|----------------------|
| <i>Homo sapiens</i>                  | 18    | 7    | 4    | 5       | 2     | 0                    |
| <i>Ciona intestinalis</i>            | 11    | 2    | 1    | 1       | 2     | 5                    |
| <i>Branchiostoma floridae</i>        | 10    | 0    | 3    | 3       | 0     | 4                    |
| <i>Strongylocentrotus purpuratus</i> | 10    | 0    | 2    | 2       | 0     | 6                    |
| <i>Saccoglossus kowalevskii</i>      | 11    | 4    | 1    | 1       | 1     | 4                    |
| <i>Drosophila melanogaster</i>       | 47    | 14   | 8    | 10      | 0     | 15                   |
| <i>Daphnia pulex</i>                 | 12    | 2    | 0    | 4       | 2     | 4                    |
| <i>Parhyale hawaiensis</i>           | 75    | 5    | 0    | 23      | 7     | 40                   |
| <i>Litopenaeus vannamei</i>          | 169   | 13   | 9    | 78      | 66    | 3                    |
| <i>Caenorhabditis elegans</i>        | 15    | 2    | 3    | 4       | 4     | 2                    |
| <i>Aplysia californica</i>           | 13    | 2    | 0    | 0       | 0     | 11                   |
| <i>Lottia gigantea</i>               | 12    | 2    | 0    | 0       | 0     | 10                   |
| <i>Nematostella vectensis</i>        | 10    | 1    | 0    | 0       | 0     | 9                    |
| <i>Trichoplax adhaerens</i>          | 12    | 0    | 0    | 0       | 0     | 12                   |
| <i>Amphimedon queenslandica</i>      | 0     | 0    | 0    | 0       | 0     | 0                    |
| <i>Pleurobrachia bachei</i> *        | 14    | 0    | 0    | 0       | 0     | 14                   |
| <i>Arabidopsis thaliana</i>          | 20    | 0    | 0    | 0       | 0     | 0                    |

**Supplementary Table 19. The statistics of structural proteins in *L. vannamei* and other 13 arthropods.**

| Category                          | Conserved domains   |           | Lvan       | Dpul | Apis | Agam | Amel | Bmor | Isca | Lmig | Phum | Smar | Turt | Tcas | Znev | Phaw |
|-----------------------------------|---------------------|-----------|------------|------|------|------|------|------|------|------|------|------|------|------|------|------|
| Cuticle proteins                  | Chitin_binding<br>4 | R&R1 type | <b>69</b>  | 64   | 15   | 48   | 23   | 63   | 0    | 34   | 13   | 13   | 1    | 40   | 12   | 34   |
|                                   |                     | R&R2 type | 39         | 175  | 94   | 105  | 25   | 108  | 54   | 51   | 21   | 13   | 29   | 53   | 37   | 49   |
| Chitin binding proteins           | Chitin_binding<br>2 |           | <b>190</b> | 108  | 38   | 91   | 82   | 59   | 47   | 66   | 37   | 59   | 52   | 95   | 47   | 115  |
| Chitinase                         |                     |           | <b>18</b>  | 11   | 5    | 8    | 7    | 4    | 5    | 5    | 5    | 4    | 9    | 6    | 6    | 6    |
| Calcified-related cuticle protein |                     |           | <b>24</b>  | 0    | 0    | 0    | 0    | 0    | 0    | 0    | 0    | 0    | 0    | 0    | 0    | 1    |

Bolded text denotes significant gene expansion in *L. vannamei*.

The structural proteins were search with conserved domains by hmmscan (<https://www.ebi.ac.uk/Tools/hmmer/search/hmmscan>). Rebers and Riddiford (R&R)1 and R&R2 type cuticle proteins were distinguished by cuticleDB (<http://bioinformatics2.biol.uoa.gr/cuticleDB/>)

Species: Lvan, *L. vannamei*. Dpul, *Daphnia pulex*. Apis, *Acyrtosiphon pisum*. Agam, *Anopheles gambiae*. Amel, *Apis mellifera*. Bmor, *Bombyx mori*. Isca, *Ixodes scapularis*. Lmig, *Locust migratoria*. Phum, *Pediculus humanus*. Smar, *Strigamia maritime*. Turt, *Tetranychus urticae*. Tcas, *Tribolium castaneum*. Znev, *Zootermopsis nevadensis*. Phaw, *Parhyale hawaiiensis*.

**Supplementary Table 20. The broodstocks for resequencing.**

| Individual ID | Population origin         | Population type |
|---------------|---------------------------|-----------------|
| SIS1          | Shrimp Improvement System | breeding line   |
| SIS2          | Shrimp Improvement System | breeding line   |
| E1            | Ecuador                   | breeding line   |
| E2            | Ecuador                   | breeding line   |
| E3            | Ecuador                   | breeding line   |
| E4            | Ecuador                   | breeding line   |
| E5            | Ecuador                   | breeding line   |
| E6            | Ecuador                   | breeding line   |
| G1            | Guihai No.1               | breeding line   |
| G2            | Guihai No.1               | breeding line   |
| K1            | Kehai No.1                | breeding line   |
| K2            | Kehai No.1                | breeding line   |
| M1            | Mexico                    | wild            |
| M2            | Mexico                    | wild            |
| M3            | Mexico                    | wild            |
| M4            | Mexico                    | wild            |
| M5            | Mexico                    | wild            |
| M6            | Mexico                    | wild            |
| M7            | Mexico                    | wild            |
| M8            | Mexico                    | wild            |
| Z1            | Charoen Pokphand          | breeding line   |
| Z2            | Charoen Pokphand          | breeding line   |

**Supplementary Table 21. Statistics of clean reads of the resequencing genomes.**

| ID      | Reads       | Bases (bp)     | Genome coverage (x) |
|---------|-------------|----------------|---------------------|
| E1      | 475,613,552 | 67,404,279,865 | 27.51               |
| E2      | 506,334,312 | 71,739,501,543 | 29.28               |
| E3      | 508,362,324 | 71,931,326,909 | 29.36               |
| E4      | 537,178,858 | 80,249,639,077 | 32.75               |
| E5      | 489,161,684 | 73,137,316,758 | 29.85               |
| E6      | 566,680,220 | 79,412,500,937 | 32.41               |
| G1      | 329,863,064 | 45,346,949,307 | 18.51               |
| G2      | 341,464,730 | 46,952,009,382 | 19.16               |
| K1      | 626,567,766 | 53,856,715,486 | 21.98               |
| K2      | 341,464,730 | 47,101,703,732 | 19.23               |
| M1      | 338,984,324 | 46,705,434,078 | 19.06               |
| M2      | 330,505,384 | 45,637,285,901 | 18.63               |
| M3      | 463,184,192 | 64,476,512,350 | 26.32               |
| M4      | 348,462,830 | 48,458,337,730 | 19.78               |
| M5      | 336,637,708 | 47,726,698,217 | 19.48               |
| M6      | 318,726,982 | 43,267,340,603 | 17.66               |
| M7      | 361,138,288 | 50,219,910,121 | 20.50               |
| M8      | 398,668,036 | 55,060,030,921 | 22.47               |
| S1      | 478,358,152 | 67,634,718,375 | 27.61               |
| S2      | 516,645,214 | 72,818,933,335 | 29.72               |
| Z1      | 328,323,444 | 44,574,314,624 | 18.19               |
| Z2      | 463,621,742 | 65,446,427,009 | 26.71               |
| Average | 427,543,070 | 58,598,085,739 | 23.92               |

**Supplementary Table 22. Statistics of variants identified in each pseudo-chromosome.**

| Chromosome | Length     | Variants  | Variants rate |
|------------|------------|-----------|---------------|
| LG1        | 52,152,945 | 1,026,941 | 50            |
| LG2        | 16,719,668 | 321,544   | 51            |
| LG3        | 66,465,400 | 1,297,714 | 51            |
| LG4        | 18,181,660 | 395,375   | 45            |
| LG5        | 13,261,821 | 275,530   | 48            |
| LG6        | 22,619,616 | 485,080   | 46            |
| LG7        | 16,413,103 | 311,149   | 52            |
| LG8        | 19,842,451 | 387,536   | 51            |
| LG9        | 43,829,617 | 799,522   | 54            |
| LG10       | 32,884,954 | 655,600   | 50            |
| LG11       | 24,369,793 | 491,093   | 49            |
| LG12       | 18,265,359 | 372,264   | 49            |
| LG13       | 36,838,812 | 732,378   | 50            |
| LG14       | 3,362,702  | 67,335    | 49            |
| LG15       | 49,763,323 | 1,022,646 | 48            |
| LG16       | 46,225,372 | 943,912   | 48            |
| LG17       | 48,762,776 | 915,275   | 53            |
| LG18       | 16,029,459 | 312,773   | 51            |
| LG19       | 27,576,248 | 559,985   | 49            |
| LG20       | 35,335,268 | 699,153   | 50            |
| LG21       | 3,572,971  | 76,099    | 46            |
| LG22       | 15,721,327 | 305,037   | 51            |
| LG23       | 8,001,244  | 145,170   | 55            |
| LG24       | 32,142,749 | 603,220   | 53            |
| LG25       | 48,751,593 | 954,580   | 51            |
| LG26       | 30,086,496 | 597,053   | 50            |
| LG27       | 39,677,014 | 732,142   | 54            |
| LG28       | 43,658,239 | 878,821   | 49            |
| LG29       | 44,455,973 | 861,651   | 51            |
| LG30       | 21,955,514 | 431,115   | 50            |
| LG31       | 44,805,893 | 889,836   | 50            |
| LG32       | 60,100,041 | 1,190,897 | 50            |
| LG33       | 21,849,204 | 438,615   | 49            |
| LG34       | 37,011,837 | 719,088   | 51            |
| LG35       | 16,919,992 | 337,830   | 50            |
| LG36       | 31,429,309 | 610,481   | 51            |
| LG37       | 34,088,060 | 662,377   | 51            |
| LG38       | 31,085,751 | 579,343   | 53            |
| LG39       | 16,351,714 | 344,893   | 47            |
| LG40       | 43,147,990 | 851,049   | 50            |
| LG41       | 30,076,848 | 611,869   | 49            |

|       |             |           |    |
|-------|-------------|-----------|----|
| LG42  | 71,142,342  | 1,395,022 | 50 |
| LG43  | 56,310,883  | 1,132,981 | 49 |
| LG44  | 38,023,466  | 780,722   | 48 |
| UNCHR | 235,123,190 | 1,026,941 | 50 |

**Supplementary Table 23. Statistics of calling variants according variant type for population.**

| Type                 | Count      | Percent |
|----------------------|------------|---------|
| Intergenic           | 28,374,241 | 86.678% |
| Intron               | 3,844,540  | 11.744% |
| Splice site acceptor | 1,400      | 0.004%  |
| Splice site donor    | 1,452      | 0.004%  |
| Splice site region   | 37,733     | 0.115%  |
| Exon                 | 475,948    | 1.454%  |

  

|      | Type                  | Count   |
|------|-----------------------|---------|
| Exon | synonymous_variant    | 261,056 |
|      | nonsynonymous_variant | 206,026 |

**Supplementary Table 24. Annotation of the genes subjected to the artificial selection pressure.**

| Gene name | Annotation                                                          |
|-----------|---------------------------------------------------------------------|
| LVAN05453 | anti-lipopolysaccharide factor like protein                         |
| LVAN05610 | AGAP002111-PA                                                       |
| LVAN05608 | NA                                                                  |
| LVAN05611 | synaptojanin-1, putative                                            |
| LVAN05607 | hypothetical protein DAPPUDRAFT_230283                              |
| LVAN05609 | Centromere protein L, partial                                       |
| LVAN05606 | hypothetical protein DAPPUDRAFT_309342                              |
| LVAN09979 | PREDICTED: tetratricopeptide repeat protein 31-like isoform X2      |
| LVAN09980 | hypothetical protein L798_04895, partial                            |
| LVAN10333 | hypothetical protein DAPPUDRAFT_243907                              |
| LVAN10335 | Follistatin-related protein 5                                       |
| LVAN10332 | NA                                                                  |
| LVAN10334 | hypothetical protein DAPPUDRAFT_243907                              |
| LVAN10541 | PREDICTED: uncharacterized protein LOC105196560                     |
| LVAN10542 | PREDICTED: Ia-related protein 6-like isoform X2                     |
| LVAN10540 | PREDICTED: ubiquitin-conjugating enzyme E2 T                        |
| LVAN11583 | PREDICTED: protocadherin-like wing polarity protein stan isoform X1 |
| LVAN12735 | hypothetical protein DAPPUDRAFT_240350                              |
| LVAN12737 | A-kinase anchor protein 13                                          |
| LVAN12736 | A-kinase anchor protein 13                                          |
| LVAN16762 | NA                                                                  |
| LVAN16764 | hypothetical protein                                                |
| LVAN16763 | GH24651                                                             |
| LVAN19641 | lactosylceramide 4-alpha-galactosyltransferase                      |
| LVAN19639 | lactosylceramide 4-alpha-galactosyltransferase                      |
| LVAN19640 | NA                                                                  |
| LVAN19643 | trafficking protein particle complex 3                              |
| LVAN19642 | NA                                                                  |

**Supplementary Table 25. Primer sequences and corresponding annealing temperature.**

| Primer name  | Primer sequence (5'-3')                    | Annealing temperature (°C) |
|--------------|--------------------------------------------|----------------------------|
| MIH1036-3qF  | GCATTCCTGCCGTCTCAAGC                       | 56.4                       |
| MIH1036-3qR  | CGATCTCGTCCTCCCTGTTG                       |                            |
| MIH1036-4qF  | GCACTACATTCCCACCGTCTT                      | 56.4                       |
| MIH1036-4qR  | TCGCAGCCTTCAGACAGACC                       |                            |
| MIH1036-6qF  | ACACCTTGCCTTTACTTCGT                       | 56.4                       |
| MIH1036-6qR  | TGGGTTCTTCTGGGCTCACT                       |                            |
| SREBP-qF     | GCTTCTGGCGACACCGTAAA                       | 56.4                       |
| SREBP-qR     | TGGAGGATCTGCCGAGTTATC                      |                            |
| 18S-qF       | TATACGCTAGTGGAGCTGGAA                      | 55                         |
| 18S-qR       | GGGGAGGTAGTGACGAAAAAT                      |                            |
| dsMIH1036-6F | TAATACGACTCACTATAGGGACACCTTGCCTTTACTTCGT   | 60                         |
| dsMIH1036-6R | TAATACGACTCACTATAGGGTGGGTTCTTCTGGGCTCACT   |                            |
| dsEGFP-F     | TAATACGACTCACTATAGGGCAGTGCTTCAGCCGCTACCC   | 60                         |
| dsEGFP-R     | TAATACGACTCACTATAGGGAGTTCACCTTGATGCCGTTCTT |                            |
| Srebp-dsF    | TAATACGACTCACTATAGGGGAGTCAAGCCTATGATTGTGCC | 62                         |
| Srebp-dsR    | TAATACGACTCACTATAGGGTCAGCCTGTTTACGGTGTCG   |                            |

**Supplementary Table 26. The primer sequences used in the dsRNA-opsin silencing.**

| Gene ID      | Primer sequence                       |
|--------------|---------------------------------------|
| LW-F+T7-1    | TAATACGACTCACTATAGGTGCCTTCCACCATTCTTT |
| LW-R+T7-1    | TAATACGACTCACTATAGGCCACCGTCTCTACCCTCA |
| LW-F-F+T7-2  | TAATACGACTCACTATAGGCCTGCTAATCTTCTGGTC |
| LW-R+T7-2    | TAATACGACTCACTATAGGTGTTCTCGCATTCCCTTC |
| LVAN19753 _F | CGTCTACAACCCCATCGT                    |
| LVAN19753 _R | CCACCGTCTCTACCCTCAG                   |
| LVAN19755 _F | CCCTTGCTTGGTGCCTTC                    |
| LVAN19755 _R | TTGTTCTCGCATTCCCTTCT                  |
| LVAN20746 _F | AAGCGAGGAAGCCCAGAA                    |
| LVAN20746 _R | CCCAGTTGATGACGAAGTAGG                 |



## Supplementary Reference:

1. Chow, S., Dougherty, W.J. & Sandifer, P.A. Meiotic Chromosome Complements and Nuclear-DNA Contents of 4 Species of Shrimps of the Genus *Penaeus*. *Journal of Crustacean Biology* 10, 29-36 (1990).
2. Chang, E.S. & Mykles, D.L. Regulation of crustacean molting: A review and our perspectives. *General and Comparative Endocrinology* 172, 323-330 (2011).
3. Covi, J.A., Chang, E.S. & Mykles, D.L. Conserved role of cyclic nucleotides in the regulation of ecdysteroidogenesis by the crustacean molting gland. *Comparative Biochemistry and Physiology a-Molecular & Integrative Physiology* 152, 470-477 (2009).
4. Seo, Y.K. *et al.* Genome-wide analysis of SREBP-1 binding in mouse liver chromatin reveals a preference for promoter proximal binding to a new motif. *Proceedings of the National Academy of Sciences of the United States of America* 106, 13765-13769 (2009).
5. Osborne, T.F. Sterol regulatory element-binding proteins (SREBPs): Key regulators of nutritional homeostasis and insulin action. *Journal of Biological Chemistry* 275, 32379-32382 (2000).
6. Song, L. *et al.* Draft genome of the Chinese mitten crab, *Eriocheir sinensis*. *Gigascience* 5, 5 (2016).
7. Zhan, X. *et al.* Peregrine and saker falcon genome sequences provide insights into evolution of a predatory lifestyle. *Nature Genetics* 45, 563-6 (2013).
8. Jia, J. *et al.* *Aegilops tauschii* draft genome sequence reveals a gene repertoire for wheat adaptation. *Nature* 496, 91-5 (2013).
9. Ling, H.Q. *et al.* Draft genome of the wheat A-genome progenitor *Triticum urartu*. *Nature* 496, 87-90 (2013).
10. Ao, J.Q. *et al.* Genome Sequencing of the Perciform Fish *Larimichthys crocea* Provides Insights into Molecular and Genetic Mechanisms of Stress Adaptation. *Plos Genetics* 11(2015).
11. Howe, K. *et al.* The zebrafish reference genome sequence and its relationship to the human genome. *Nature* 496, 498-503 (2013).
12. Wang, X.H. *et al.* The locust genome provides insight into swarm formation and long-distance flight. *Nature Communications* 5, 1-9 (2014).
13. Simakov, O. *et al.* Insights into bilaterian evolution from three spiralian genomes. *Nature* 493, 526-531 (2013).
14. Colbourne, J.K. *et al.* The ecoresponsive genome of *Daphnia pulex*. *Science* 331, 555-61 (2011).
15. Zhang, G. *et al.* The oyster genome reveals stress adaptation and complexity of shell formation. *Nature* 490, 49-54 (2012).
16. Armbrust, E.V. *et al.* The genome of the diatom *Thalassiosira pseudonana*: ecology, evolution, and metabolism. *Science* 306, 79-86 (2004).
17. Jiang, Q., Li, Q., Yu, H. & Kong, L.F. Genome-Wide Analysis of Simple Sequence Repeats in Marine Animals-a Comparative Approach. *Marine Biotechnology* 16, 604-619 (2014).
18. Gutekunst, J. *et al.* Clonal genome evolution and rapid invasive spread of the marbled crayfish. *Nature Ecology & Evolution* 2, 567-573 (2018).
19. Kao, D. *et al.* The genome of the crustacean *Parhyale hawaiiensis*, a model for animal development, regeneration, immunity and lignocellulose digestion. *elife* 5(2016).
